# Supplementary material for: A Tumor-Associated Mutation of FYVE-CENT Prevents Its Interaction with Beclin 1 and Interferes with Cytokinesis
Source: PLoS One. 2011 Mar 24;6(3):e17086. doi: 10.1371/journal.pone.0017086 (PMC3063775; doi:10.1371/journal.pone.0017086)
Supplement: Dataset S1 — Positive hits from yeast two-hybrid screening with the C-terminus of FYVE-CENT. A list of the interacting proteins with the C-terminus (residues 2120–2539) of ZFYVE26 (FYVE-CENT) were identified in a two-hybrid screen of a human T cells RP1 (CEMC7) cell library. The data are from Hybrigenics S.A, Paris, France. (XLS) [file pone.0017086.s004.xls]

## Sheet: AS545173_CEMC7_RP_hgx1880v1_pB2
HYBRIGENICS Program = CEMC7_RP Screen = hgx1880v1 Vector = pB27 (LexA, C-terminal fusion)
hgx001880 - Human ZFYVE26 (2120-2539) vs Human T cells RP1 (CEMC7)
Clone Name	Type Seq	Contig(s) Name	Gene Name (Best Match)	GID	Additional Gene Notes	Start	Stop	Frame	Orientation	UTR Inclusion	% Id 5p/3p	Alu Warning 5p	Alu Warning 3p	5p Sequence	3p Sequence	Frag theoretical Sequence
CEMC7_RP_hgx1880v1_pB27_A-24	3p	28874398	Homo sapiens - AMFR	GID: 85815824	AMFR; [gi|85815824|ref|NM_001144.4| Homo sapiens autocrine motility factor receptor (AMFR), mRNA]	No Data	1153	??	Sense		99.5				GAACTATCTACGTGTGGTTGGAAACATGGAGGCCAGGTTTGCAGTTGCAACTCCAGAGGAGCTGGCTGTCAACAATGACGACTGTGCCATCTGTTGGGACTCCATGCAGGCTGCGCGGAAACTGCCCTGTGGACATCTTTTCCACAACTCCTGTCTTCGTTCCTGGCTAGAACAAGACACCTCCTGTCCAACATGCAGAATGTCTCTTAATGTTGC
CEMC7_RP_hgx1880v1_pB27_A-7	5p 3p	28874428 / 28874419	Homo sapiens - ANKRD11	GID: 56676396	ANKRD11; [gi|56676396|ref|NM_013275.4| Homo sapiens ankyrin repeat domain 11 (ANKRD11), mRNA]	7491	8030	IF	Sense		81.0 / 99.4			GGCGGAGCCCCCGAAGGAGCCGTTCAGGCAGCAGGAGGCCGTCCGGGGAAAGCAGCGTCTACAGCACAGCATCGAGCGGGAGAAGCAGAGCGTATCCTGTGAGCAGGAGAGCTGCGGGGCACGGCCGGGCGGCCAGGACCTGCGCCAACCAGGCAGTGCCTGGCAGCGCCGGCACGAGGCGGCGGGACGCCGAGGTTTACAACATGCCCCTGGAGAGCCAGGGGGACGAGAACAATGCAGGGCGCGACCGGGCAACGCCCGCCAGGTAGTGCCGGGCGCCTGGACGGGGAGGACATTGTGGACCGCAGGAATACGGCCCCGCAGCGGCAGCTGCACGAGGCCGCTGTCCGGATCGCCGGCATATGAGGGAGGGGCTTCGGAAGGGGCAGGTACAGGACC…	GGCGGAGCCCCTGAAGGAGCTGTTCAGGCAGCAGGAGGCCGTCCGGGGAAAGCTGCGTCTACAGCACAGCATCGAGCGGGAGAAGCTGATCGTATCCTGTGAGCAGGAGATTCTGCGGGTTCACTGCCGGGCGGCCAGGACCATCGCCAACCAGGCAGTGCCATTCAGCGCCTGCACGATGCTGCTGGACTCCGAGGTCTACAACATGCCCCTGGAGAGCCAGGGTGACGAGAACAAGTCAGTGCGCGACCGTTTCAACGCCCGCCAGTTCATCTCCTGGCTCCAGGACGTGGATGACAAGTATGACCGCATGAAGACTTGCCTCCTCATGCGGCAGCAGCACGAGGCCGCGGCCCTGAACGCCGTGCAGAGGATGGAGTGGCAGCTGAAGGTGCAGGA…	GGCGGAGCCCCTGAAGGAGCTGTTCAGGCAGCAGGAGGCCGTCCGGGGAAAGCTGCGTCTACAGCACAGCATCGAGCGGGAGAAGCTGATCGTATCCTGTGAGCAGGAGATTCTGCGGGTTCACTGCCGGGCGGCCAGGACCATCGCCAACCAGGCAGTGCCATTCAGCGCCTGCACGATGCTGCTGGACTCCGAGGTCTACAACATGCCCCTGGAGAGCCAGGGTGACGAGAACAAGTCAGTGCGCGACCGTTTCAACGCCCGCCAGTTCATCTCCTGGCTCCAGGACGTGGATGACAAGTATGACCGCATGAAGACTTGCCTCCTCATGCGGCAGCAGCACGAGGCCGCGGCCCTGAACGCCGTGCAGAGGATGGAGTGGCAGCTGAAGGTGCAGGA…
CEMC7_RP_hgx1880v1_pB27_A-82	5p 3p	28874354	Homo sapiens - BANF1	GID: 11038645	BANF1; [gi|11038645|ref|NM_003860.2| Homo sapiens Breakpoint cluster region protein, uterine leiomyoma, 1; barrier to autointegration factor (BCRP1), mRNA]	48	294	IF	Sense		99.6 / 99.6			GGAGAAGCCAGTGGGGAGCCTGGCTGGGATTGGTGAAGTCCTGGGCAAGAAGCTGGAGGAAAGGGGTTTTGACAAGGCCTATGTTGTCCTTGGCCAGTTTCTGGTGCTAAAGAAAGATGAAGACCTCTTCCGGGAATGGCTGAAAGACACTTGTGGCGCCAACGCCAAGCAGTCCCGGGACTGCTTCGGATGCCTTCGAGAGTGGTGCGACGCCTTCTTGTGATGCTCTCTGGGAAGCTCTCAATCCTTCGTGGCCCCTGGGGCCCCTCGAGTAGCTAGTGTCTAGAGGCCCGGTACCCAATTCGCCCTATAGTGAGTCGTATTACAATTCACTGGCCGTCGTTTTACAACGTCGTGACTGGGAAAACCCTGATCTATGAATCGTAGATACTGAAAAAC…	GGAGAAGCCAGTGGGGAGCCTGGCTGGGATTGGTGAAGTCCTGGGCAAGAAGCTGGAGGAAAGGGGTTTTGACAAGGCCTATGTTGTCCTTGGCCAGTTTCTGGTGCTAAAGAAAGATGAAGACCTCTTCCGGGAATGGCTGAAAGACACTTGTGGCGCCAACGCCAAGCAGTCCCGGGACTGCTTCGGATGCCTTCGAGAGTGGTGCGACGCCTTCTTGTGATGCTCTCTGGGAAGCTCTCAATCC	GGAGAAGCCAGTGGGGAGCCTGGCTGGGATTGGTGAAGTCCTGGGCAAGAAGCTGGAGGAAAGGGGTTTTGACAAGGCCTATGTTGTCCTTGGCCAGTTTCTGGTGCTAAAGAAAGATGAAGACCTCTTCCGGGAATGGCTGAAAGACACTTGTGGCGCCAATGCCAAGCAGTCCCGGGACTGCTTCGGATGCCTTCGAGAGTGGTGCGACGCCTTCTTGTGATGCTCTCTGGGAAGCTCTCAATCC
CEMC7_RP_hgx1880v1_pB27_A-60	5p 3p	28874354	Homo sapiens - BANF1	GID: 11038645	BANF1; [gi|11038645|ref|NM_003860.2| Homo sapiens Breakpoint cluster region protein, uterine leiomyoma, 1; barrier to autointegration factor (BCRP1), mRNA]	48	289	IF	Sense		99.6 / 99.6			GGAGAAGCCAGTGGGGAGCCTGGCTGGGATTGGTGAAGTCCTGGGCAAGAAGCTGGAGGAAAGGGGTTTTGACAAGGCCTATGTTGTCCTTGGCCAGTTTCTGGTGCTAAAGAAAGATGAAGACCTCTTCCGGGAATGGCTGAAAGACACTTGTGGCGCCAACGCCAAGCAGTCCCGGGACTGCTTCGGATGCCTTCGAGAGTGGTGCGACGCCTTCTTGTGATGCTCTCTGGGAAGCTCTC	GGAGAAGCCAGTGGGGAGCCTGGCTGGGATTGGTGAAGTCCTGGGCAAGAAGCTGGAGGAAAGGGGTTTTGACAAGGCCTATGTTGTCCTTGGCCAGTTTCTGGTGCTAAAGAAAGATGAAGACCTCTTCCGGGAATGGCTGAAAGACACTTGTGGCGCCAACGCCAAGCAGTCCCGGGACTGCTTCGGATGCCTTCGAGAGTGGTGCGACGCCTTCTTGTGATGCTCTCTGGGAAGCTCTC	GGAGAAGCCAGTGGGGAGCCTGGCTGGGATTGGTGAAGTCCTGGGCAAGAAGCTGGAGGAAAGGGGTTTTGACAAGGCCTATGTTGTCCTTGGCCAGTTTCTGGTGCTAAAGAAAGATGAAGACCTCTTCCGGGAATGGCTGAAAGACACTTGTGGCGCCAATGCCAAGCAGTCCCGGGACTGCTTCGGATGCCTTCGAGAGTGGTGCGACGCCTTCTTGTGATGCTCTCTGGGAAGCTCTC
CEMC7_RP_hgx1880v1_pB27_A-31	5p 3p	28874432	Homo sapiens - BANF1	GID: 11038645	BANF1; [gi|11038645|ref|NM_003860.2| Homo sapiens Breakpoint cluster region protein, uterine leiomyoma, 1; barrier to autointegration factor (BCRP1), mRNA]	63	516	IF	Sense		99.8 / 99.8			GAGCCTGGCTGGGATTGGTGAAGTCCTGGGCAAGAAGCTGGAGGAAAGGGGTTTTGACAAGGCCTATGTTGTCCTTGGCCAGTTTCTGGTGCTAAAGAAAGATGAAGACCTCTTCCGGGAATGGCTGAAAGACACTTGTGGCGCCAACGCCAAGCAGTCCCGGGACTGCTTCGGATGCCTTCGAGAGTGGTGCGACGCCTTCTTGTGATGCTCTCTGGGAAGCTCTCAATCCCCAGCCCTCATCCAGAGTTTGCAGCCGAGTAGGGACTCCTCCCCTGTCCTCTACGAAGGAAAAGATTGCTATTGTCGTACTCACCTCCGACGTACTCCGGGGTCTTTTGGGAGTTTTCTCCCCTAACCATTTCAACTTTTTTTTGGATTCTCGCTCTTGCATGCCTC…	GAGCCTGGCTGGGATTGGTGAAGTCCTGGGCAAGAAGCTGGAGGAAAGGGGTTTTGACAAGGCCTATGTTGTCCTTGGCCAGTTTCTGGTGCTAAAGAAAGATGAAGACCTCTTCCGGGAATGGCTGAAAGACACTTGTGGCGCCAACGCCAAGCAGTCCCGGGACTGCTTCGGATGCCTTCGAGAGTGGTGCGACGCCTTCTTGTGATGCTCTCTGGGAAGCTCTCAATCCCCAGCCCTCATCCAGAGTTTGCAGCCGAGTAGGGACTCCTCCCCTGTCCTCTACGAAGGAAAAGATTGCTATTGTCGTACTCACCTCCGACGTACTCCGGGGTCTTTTGGGAGTTTTCTCCCCTAACCATTTCAACTTTTTTTTGGATTCTCGCTCTTGCATGCCTC…	GAGCCTGGCTGGGATTGGTGAAGTCCTGGGCAAGAAGCTGGAGGAAAGGGGTTTTGACAAGGCCTATGTTGTCCTTGGCCAGTTTCTGGTGCTAAAGAAAGATGAAGACCTCTTCCGGGAATGGCTGAAAGACACTTGTGGCGCCAATGCCAAGCAGTCCCGGGACTGCTTCGGATGCCTTCGAGAGTGGTGCGACGCCTTCTTGTGATGCTCTCTGGGAAGCTCTCAATCCCCAGCCCTCATCCAGAGTTTGCAGCCGAGTAGGGACTCCTCCCCTGTCCTCTACGAAGGAAAAGATTGCTATTGTCGTACTCACCTCCGACGTACTCCGGGGTCTTTTGGGAGTTTTCTCCCCTAACCATTTCAACTTTTTTTTGGATTCTCGCTCTTGCATGCCTC…
CEMC7_RP_hgx1880v1_pB27_A-18	5p 3p	28874432	Homo sapiens - BANF1	GID: 11038645	BANF1; [gi|11038645|ref|NM_003860.2| Homo sapiens Breakpoint cluster region protein, uterine leiomyoma, 1; barrier to autointegration factor (BCRP1), mRNA]	63	516	IF	Sense		99.8 / 99.8			GAGCCTGGCTGGGATTGGTGAAGTCCTGGGCAAGAAGCTGGAGGAAAGGGGTTTTGACAAGGCCTATGTTGTCCTTGGCCAGTTTCTGGTGCTAAAGAAAGATGAAGACCTCTTCCGGGAATGGCTGAAAGACACTTGTGGCGCCAACGCCAAGCAGTCCCGGGACTGCTTCGGATGCCTTCGAGAGTGGTGCGACGCCTTCTTGTGATGCTCTCTGGGAAGCTCTCAATCCCCAGCCCTCATCCAGAGTTTGCAGCCGAGTAGGGACTCCTCCCCTGTCCTCTACGAAGGAAAAGATTGCTATTGTCGTACTCACCTCCGACGTACTCCGGGGTCTTTTGGGAGTTTTCTCCCCTAACCATTTCAACTTTTTTTTGGATTCTCGCTCTTGCATGCCTC…	GAGCCTGGCTGGGATTGGTGAAGTCCTGGGCAAGAAGCTGGAGGAAAGGGGTTTTGACAAGGCCTATGTTGTCCTTGGCCAGTTTCTGGTGCTAAAGAAAGATGAAGACCTCTTCCGGGAATGGCTGAAAGACACTTGTGGCGCCAACGCCAAGCAGTCCCGGGACTGCTTCGGATGCCTTCGAGAGTGGTGCGACGCCTTCTTGTGATGCTCTCTGGGAAGCTCTCAATCCCCAGCCCTCATCCAGAGTTTGCAGCCGAGTAGGGACTCCTCCCCTGTCCTCTACGAAGGAAAAGATTGCTATTGTCGTACTCACCTCCGACGTACTCCGGGGTCTTTTGGGAGTTTTCTCCCCTAACCATTTCAACTTTTTTTTGGATTCTCGCTCTTGCATGCCTC…	GAGCCTGGCTGGGATTGGTGAAGTCCTGGGCAAGAAGCTGGAGGAAAGGGGTTTTGACAAGGCCTATGTTGTCCTTGGCCAGTTTCTGGTGCTAAAGAAAGATGAAGACCTCTTCCGGGAATGGCTGAAAGACACTTGTGGCGCCAATGCCAAGCAGTCCCGGGACTGCTTCGGATGCCTTCGAGAGTGGTGCGACGCCTTCTTGTGATGCTCTCTGGGAAGCTCTCAATCCCCAGCCCTCATCCAGAGTTTGCAGCCGAGTAGGGACTCCTCCCCTGTCCTCTACGAAGGAAAAGATTGCTATTGTCGTACTCACCTCCGACGTACTCCGGGGTCTTTTGGGAGTTTTCTCCCCTAACCATTTCAACTTTTTTTTGGATTCTCGCTCTTGCATGCCTC…
CEMC7_RP_hgx1880v1_pB27_A-32	5p 3p	28874432	Homo sapiens - BANF1	GID: 11038645	BANF1; [gi|11038645|ref|NM_003860.2| Homo sapiens Breakpoint cluster region protein, uterine leiomyoma, 1; barrier to autointegration factor (BCRP1), mRNA]	63	516	IF	Sense		99.8 / 99.1			GAGCCTGGCTGGGATTGGTGAAGTCCTGGGCAAGAAGCTGGAGGAAAGGGGTTTTGACAAGGCCTATGTTGTCCTTGGCCAGTTTCTGGTGCTAAAGAAAGATGAAGACCTCTTCCGGGAATGGCTGAAAGACACTTGTGGCGCCAACGCCAAGCAGTCCCGGGACTGCTTCGGATGCCTTCGAGAGTGGTGCGACGCCTTCTTGTGATGCTCTCTGGGAAGCTCTCAATCCCCAGCCCTCATCCAGAGTTTGCAGCCGAGTAGGGACTCCTCCCCTGTCCTCTACGAAGGAAAAGATTGCTATTGTCGTACTCACCTCCGACGTACTCCGGGGTCTTTTGGGAGTTTTCTCCCCTAACCATTTCAACTTTTTTTTGGATTCTCGCTCTTGCATGCCTC…	GAGCCTGGCTGGGATTGGTGAAGTCCTGGGCAAGAAGCTGGAGGAAAGGGGTTTTGACAAGGCCTATGTTGTCCTTGGCCAGTTTCTGGTGCTAAAGAAAGATGAAGACCTCTTCCGGGAATGGCTGAAAGACACTTGTGGCGCCAACGCCAAGCAGTCCCGGGACTGCTTCGGATGCCTTCGAGAGTGGTGCGACGCCTTCTTGTGATGCTCTCTGGGAAGCTCTCAATCCCCAGCCCTCATCCAGAGTTTGCAGCCGAGTAGGGACTCCTCCCCTGTCCTCTACGAAGGAAAAGATTGCTATTGTCGTACTCACCTCCGACGTACTCCGGGGTCTTTTGGGAGTTTTCTCCCCTAACCATTTCAACTTTTTTTTGGATTCTCGCTCTTGCATGCCTC…	GAGCCTGGCTGGGATTGGTGAAGTCCTGGGCAAGAAGCTGGAGGAAAGGGGTTTTGACAAGGCCTATGTTGTCCTTGGCCAGTTTCTGGTGCTAAAGAAAGATGAAGACCTCTTCCGGGAATGGCTGAAAGACACTTGTGGCGCCAATGCCAAGCAGTCCCGGGACTGCTTCGGATGCCTTCGAGAGTGGTGCGACGCCTTCTTGTGATGCTCTCTGGGAAGCTCTCAATCCCCAGCCCTCATCCAGAGTTTGCAGCCGAGTAGGGACTCCTCCCCTGTCCTCTACGAAGGAAAAGATTGCTATTGTCGTACTCACCTCCGACGTACTCCGGGGTCTTTTGGGAGTTTTCTCCCCTAACCATTTCAACTTTTTTTTGGATTCTCGCTCTTGCATGCCTC…
CEMC7_RP_hgx1880v1_pB27_A-103	5p 3p	28874472	Homo sapiens - Beclin1	GID: 4502394	Beclin1; hbeclin 1 (coiled-coil, myosin-like BCL2-interactingprotein); hBECN1; [gi|4502394|ref|NM_003766.1| Homo sapiens beclin 1 (coiled-coil, myosin-like BCL2 interacting protein) (BECN1), mRNA]	480	1524	IF	Sense		98.8 / 100.0			GAACTACAAACGCTGTTTGGAGATCTTAGAGCAAATGAATGAGGATGACAGTGAACAGTTACAGATGGAGCTAAAGGAGCTGGCACTAGAGGAGGAGAGGCTGATCCAGGAGCTGGAAGACGTGGAAAAGAACCGCAAGATAGTGGCAGAAAATCTCGAGAAGGTCCAGGCTGAGGCTGAGAGACTGGATCAGGAGGAAGCTCAGTATCAGAGAGAATACAGTGAATTTAAACGACAGCAGCTGGAGCTGGATGATGAGCTGAAGAGTGTTGAAAACCAGTTGCTTTATGCCCAGACGCAGCTGGATAAGCTGAAGAAAACCAACGTCTTTAATGCAACCTTCCACATCTGGCACAGTGGACAGTTTGGCACAATCAATAACTTCAGGCTGGGTCGCCT…	CAGTGGACAGTTTGGCACAATCAATAACTTCAGGCTGGGTCGCCTGCCCAGTGTTCCCGTGGAATGGAATGAGATTAATGCTGCTTGGGGCCAGACTGTGTTGCTGCTCCATGCTCTGGCCAATAAGATGGGTCTGAAATTTCAGAGATACCGACTTGTTCCTTACGGAAACCATTCATATCTGGAGTCTCTGACAGACAAATCTAAGGAGCTGCCGTTATACTGTTCTGGGGGGTTGCGGTTTTTCTGGGACAACAAGTTTGACCATGCAATGGTGGCTTTCCTGGACTGTGTGCAGCAGTTCAAAGAAGAGGTTGAGAAAGGCGAGACACGTTTTTGTCTTCCCTACAGGATGGATGTGGAGAAAGGCAAGATTGAAGACACAGGAGGCAGTGGCGG…	GAACTACAAACGCTGTTTGGAGATCTTAGAGCAAATGAATGAGGATGACAGTGAACAGTTACAGATGGAGCTAAAGGAGCTGGCACTAGAGGAGGAGAGGCTGATCCAGGAGCTGGAAGACGTGGAAAAGAACCGCAAGATAGTGGCAGAAAATCTCGAGAAGGTCCAGGCTGAGGCTGAGAGACTGGATCAGGAGGAAGCTCAGTATCAGAGAGAATACAGTGAATTTAAACGACAGCAGCTGGAGCTGGATGATGAGCTGAAGAGTGTTGAAAACCAGATGCGTTATGCCCAGACGCAGCTGGATAAGCTGAAGAAAACCAACGTCTTTAATGCAACCTTCCACATCTGGCACAGTGGACAGTTTGGCACAATCAATAACTTCAGGCTGGGTCGCCT…
CEMC7_RP_hgx1880v1_pB27_A-23	5p 3p	28874402	Homo sapiens - CALU	GID: 6005991	CALU; [gi|6005991|ref|NM_001219.2| Homo sapiens calumenin (CALU), mRNA]	-16	693	IF	Sense		100.0 / 100.0			GAAAGATCTAATTATCATGGACCTGCGACAGTTTCTTATGTGCCTGTCCCTGTGCACAGCCTTTGCCTTGAGCAAACCCACAGAAAAGAAGGACCGTGTACATCATGAGCCTCAGCTCAGTGACAAGGTTCACAATGATGCTCAGAGTTTTGATTATGACCATGATGCCTTCTTGGGTGCTGAAGAAGCAAAGACCTTTGATCAGCTGACACCAGAAGAGAGCAAGGAAAGGCTTGGAAAGATTGTAAGTAAAATAGATGGCGACAAGGACGGGTTTGTCACTGTGGATGAGCTCAAAGACTGGATTAAATTTGCACAAAAGCGCTGGATTTACGAGGATGTAGAGCGACAGTGGAAGGGGCATGACCTCAATGAGGACGGCCTCGTTTCCTGGGAGGA…	TGAGCAAACCCACAGAAAAGAAGGACCGTGTACATCATGAGCCTCAGCTCAGTGACAAGGTTCACAATGATGCTCAGAGTTTTGATTATGACCATGATGCCTTCTTGGGTGCTGAAGAAGCAAAGACCTTTGATCAGCTGACACCAGAAGAGAGCAAGGAAAGGCTTGGAAAGATTGTAAGTAAAATAGATGGCGACAAGGACGGGTTTGTCACTGTGGATGAGCTCAAAGACTGGATTAAATTTGCACAAAAGCGCTGGATTTACGAGGATGTAGAGCGACAGTGGAAGGGGCATGACCTCAATGAGGACGGCCTCGTTTCCTGGGAGGAGTATAAAAATGCCACCTACGGCTACGTTTTAGATGATCCAGATCCTGATGATGGATTTAACTATAAAC…	GAAAGATCTAATTATCATGGACCTGCGACAGTTTCTTATGTGCCTGTCCCTGTGCACAGCCTTTGCCTTGAGCAAACCCACAGAAAAGAAGGACCGTGTACATCATGAGCCTCAGCTCAGTGACAAGGTTCACAATGATGCTCAGAGTTTTGATTATGACCATGATGCCTTCTTGGGTGCTGAAGAAGCAAAGACCTTTGATCAGCTGACACCAGAAGAGAGCAAGGAAAGGCTTGGAAAGATTGTAAGTAAAATAGATGGCGACAAGGACGGGTTTGTCACTGTGGATGAGCTCAAAGACTGGATTAAATTTGCACAAAAGCGCTGGATTTACGAGGATGTAGAGCGACAGTGGAAGGGGCATGACCTCAATGAGGACGGCCTCGTTTCCTGGGAGGA…
CEMC7_RP_hgx1880v1_pB27_A-64	5p 3p	28874402	Homo sapiens - CALU	GID: 6005991	CALU; [gi|6005991|ref|NM_001219.2| Homo sapiens calumenin (CALU), mRNA]	9	915	IF	Sense		100.0 / 99.9			GCGACAGTTTCTTATGTGCCTGTCCCTGTGCACAGCCTTTGCCTTGAGCAAACCCACAGAAAAGAAGGACCGTGTACATCATGAGCCTCAGCTCAGTGACAAGGTTCACAATGATGCTCAGAGTTTTGATTATGACCATGATGCCTTCTTGGGTGCTGAAGAAGCAAAGACCTTTGATCAGCTGACACCAGAAGAGAGCAAGGAAAGGCTTGGAAAGATTGTAAGTAAAATAGATGGCGACAAGGACGGGTTTGTCACTGTGGATGAGCTCAAAGACTGGATTAAATTTGCACAAAAGCGCTGGATTTACGAGGATGTAGAGCGACAGTGGAAGGGGCATGACCTCAATGAGGACGGCCTCGTTTCCTGGGAGGAGTATAAAAATGCCACCTACGGCTA…	CAGGGACGGGTTTGTCACTGTGGATGAGCTCAAAGACTGGATTAAATTTGCACAAAAGCGCTGGATTTACGAGGATGTAGAGCGACAGTGGAAGGGGCATGACCTCAATGAGGACGGCCTCGTTTCCTGGGAGGAGTATAAAAATGCCACCTACGGCTACGTTTTAGATGATCCAGATCCTGATGATGGATTTAACTATAAACAGATGATGGTTAGAGATGAGCGGAGGTTTAAAATGGCAGACAAGGATGGAGACCTCATTGCCACCAAGGAGGAGTTCACAGCTTTCCTGCACCCTGAGGAGTATGACTACATGAAAGATATAGTAGTACAGGAAACAATGGAAGATATAGATAAGAATGCTGATGGTTTCATTGATCTAGAAGAGTATATTGGTGA…	GCGACAGTTTCTTATGTGCCTGTCCCTGTGCACAGCCTTTGCCTTGAGCAAACCCACAGAAAAGAAGGACCGTGTACATCATGAGCCTCAGCTCAGTGACAAGGTTCACAATGATGCTCAGAGTTTTGATTATGACCATGATGCCTTCTTGGGTGCTGAAGAAGCAAAGACCTTTGATCAGCTGACACCAGAAGAGAGCAAGGAAAGGCTTGGAAAGATTGTAAGTAAAATAGATGGCGACAAGGACGGGTTTGTCACTGTGGATGAGCTCAAAGACTGGATTAAATTTGCACAAAAGCGCTGGATTTACGAGGATGTAGAGCGACAGTGGAAGGGGCATGACCTCAATGAGGACGGCCTCGTTTCCTGGGAGGAGTATAAAAATGCCACCTACGGCTA…
CEMC7_RP_hgx1880v1_pB27_A-6	5p 3p	28874402	Homo sapiens - CALU	GID: 6005991	CALU; [gi|6005991|ref|NM_001219.2| Homo sapiens calumenin (CALU), mRNA]	9	915	IF	Sense		100.0 / 99.8			GCGACAGTTTCTTATGTGCCTGTCCCTGTGCACAGCCTTTGCCTTGAGCAAACCCACAGAAAAGAAGGACCGTGTACATCATGAGCCTCAGCTCAGTGACAAGGTTCACAATGATGCTCAGAGTTTTGATTATGACCATGATGCCTTCTTGGGTGCTGAAGAAGCAAAGACCTTTGATCAGCTGACACCAGAAGAGAGCAAGGAAAGGCTTGGAAAGATTGTAAGTAAAATAGATGGCGACAAGGACGGGTTTGTCACTGTGGATGAGCTCAAAGACTGGATTAAATTTGCACAAAAGCGCTGGATTTACGAGGATGTAGAGCGACAGTGGAAGGGGCATGACCTCAATGAGGACGGCCTCGTTTCCTGGGAGGAGTATAAAAATGCCACCTACGGCTA…	GGACGGGTTTGTCACTGTGGATGAGCTCAAAGACTGGATTAAATTTGCACAAAAGCGCTGGATTTACGAGGATGTAGAGCGACAGTGGAAGGGGCATGACCTCAATGAGGACGGCCTCGTTTCCTGGGAGGAGTATAAAAATGCCACTACGGCTACGTTTTAGATGATCCAGATCCTGATGATGGATTTAACTATAAACAGATGATGGTTAGAGATGAGCGGAGGTTTAAAATGGCAGACAAGGATGGAGACCTCATTGCCACCAAGGAGGAGTTCACAGCTTTCCTGCACCCTGAGGAGTATGACTACATGAAAGATATAGTAGTACAGGAAACAATGGAAGATATAGATAAGAATGCTGATGGTTTCATTGATCTAGAAGAGTATATTGGTGACATG…	GCGACAGTTTCTTATGTGCCTGTCCCTGTGCACAGCCTTTGCCTTGAGCAAACCCACAGAAAAGAAGGACCGTGTACATCATGAGCCTCAGCTCAGTGACAAGGTTCACAATGATGCTCAGAGTTTTGATTATGACCATGATGCCTTCTTGGGTGCTGAAGAAGCAAAGACCTTTGATCAGCTGACACCAGAAGAGAGCAAGGAAAGGCTTGGAAAGATTGTAAGTAAAATAGATGGCGACAAGGACGGGTTTGTCACTGTGGATGAGCTCAAAGACTGGATTAAATTTGCACAAAAGCGCTGGATTTACGAGGATGTAGAGCGACAGTGGAAGGGGCATGACCTCAATGAGGACGGCCTCGTTTCCTGGGAGGAGTATAAAAATGCCACCTACGGCTA…
CEMC7_RP_hgx1880v1_pB27_A-58	5p 3p	28874363	Homo sapiens - CTR9	GID: 141803441	CTR9; [gi|141803441|ref|NM_014633.3| Homo sapiens Ctr9, Paf1/RNA polymerase II complex component, homolog (S. cerevisiae) (CTR9), mRNA]	-19	995	IF	Sense		99.8 / 99.7			CTCGCCTTTTGACCCCATCATGTCGCGGGGCTCCATCGAGATTCCCCTCCGGGACACTGACGAGGTCATTGAACTTGACTTCGATCAGTTACCGGAGGGAGATGAAGTTATCAGTATTCTGAAACAGGAACACACACAACTGCACATATGGATTGCTTTGGCGCTGGAATACTACAAGCAAGGAAAAACAGAAGAGTTTGTAAAATTGTTGGAAGCAGCACGTATAGATGGCAATTTGGACTATAGAGACCATGAAAAAGACCAGATGACTTGCTTGGATACATTGGCAGCGTATTATGTACAACAGGCTCGGAAAGAAAAGAATAAGGACAATAAAAAGGATCTTATTACACAGGCCACCTTGTTGTATACAATGGCCGATAAAATTATTATGTATGA…	GTATACAATGGCCGATAAAAATTATTATGTATGATCAGAACCATTTGTTGGGAAGAGCCTGCTTCTGCGTACTTGAGGGTGACAAAATGGATCAAGCTGATGCACAGTTTCATTTTGTACTCAATCAGTCTCCAAATAATATTCCAGCCCTTCTTGGTAAAGCTTGCATTTCCTTCAACAAGAAGGATTACAGAGGAGCTCTTGCTTACTATAAGAAAGCATTGCGTACTAACCCAGGATGTCCAGCGGAAGTTCGTTTAGGAATGGGTCATTGCTTTGTGAAACTTAACAAACTGGAAAAAGCTCGTCTGGCATTCAGCAGAGCCCTGGAACTCAATTCCAAATGCGTGGGAGCATTGGTTGGACTGGCTGTTCTAGAACTCAACAATAAAGAGGCTG…	CTCGCCTTTTGACCCCATCATGTCGCGGGGCTCCATCGAGATTCCCCTCCGGGACACTGACGAGGTCATTGAACTTGACTTCGATCAGTTACCGGAGGGAGATGAAGTTATCAGTATTCTGAAACAGGAACACACACAACTGCACATATGGATTGCTTTGGCGCTGGAATACTACAAGCAAGGAAAAACAGAAGAGTTTGTAAAATTGTTGGAAGCAGCACGTATAGATGGCAATTTGGACTATAGAGACCATGAAAAAGACCAGATGACTTGCTTGGATACATTGGCAGCGTATTATGTACAACAGGCTCGGAAAGAAAAGAATAAGGACAATAAAAAGGATCTTATTACACAGGCCACCTTGTTGTATACAATGGCCGATAAAATTATTATGTATGA…
CEMC7_RP_hgx1880v1_pB27_A-51	5p 3p	28874363	Homo sapiens - CTR9	GID: 141803441	CTR9; [gi|141803441|ref|NM_014633.3| Homo sapiens Ctr9, Paf1/RNA polymerase II complex component, homolog (S. cerevisiae) (CTR9), mRNA]	-19	995	IF	Sense		99.9 / 99.4			CTCGCCTTTTGACCCCATCATGTCGCGGGGCTCCATCGAGATTCCCCTCCGGGACACTGACGAGGTCATTGAACTTGACTTCGATCAGTTACCGGAGGGAGATGAAGTTATCAGTATTCTGAAACAGGAACACACACAACTGCACATATGGATTGCTTTGGCGCTGGAATACTACAAGCAAGGAAAAACAGAAGAGTTTGTAAAATTGTTGGAAGCAGCACGTATAGATGGCAATTTGGACTATAGAGACCATGAAAAAGACCAGATGACTTGCTTGGATACATTGGCAGCGTATTATGTACAACAGGCTCGGAAAGAAAAGAATAAGGACAATAAAAAGGATCTTATTACACAGGCCACCTTGTTGTATACAATGGCCGATAAAATTATTATGTATGA…	CTTATTACACAGGGCCACCTTGTTGTATACAATGGCCGATAAAATTATTATGTATGATCAGAACCATTTGTTGGGAAGAGCTGCTCTGCGTACTTGAGGGTGACAAAATGGATCAAGCTGATGCACAGTTTCATTTTGTACTCAATCAGTCTCCAAATAATATTCCAGCCCTTCTTGGTAAAGCTTGCATTTCCTTCAACAAGAAGGATTACAGAGGAGCTCTTGCTTACTATAAGAAAGCATTGCGTACTAACCCAGGATGTCCAGCGGAAGTTCGTTTAGGAATGGGTCATTGCTTTGTGAAACTTAACAAACTGGAAAAAGCTCGTCTGGCATTCAGCAGAGCCCTGGAACTCAATTCCAAATGCGTGGGAGCATTGGTTGGACTGGCTGTTCTAG…	CTCGCCTTTTGACCCCATCATGTCGCGGGGCTCCATCGAGATTCCCCTCCGGGACACTGACGAGGTCATTGAACTTGACTTCGATCAGTTACCGGAGGGAGATGAAGTTATCAGTATTCTGAAACAGGAACACACACAACTGCACATATGGATTGCTTTGGCGCTGGAATACTACAAGCAAGGAAAAACAGAAGAGTTTGTAAAATTGTTGGAAGCAGCACGTATAGATGGCAATTTGGACTATAGAGACCATGAAAAAGACCAGATGACTTGCTTGGATACATTGGCAGCGTATTATGTACAACAGGCTCGGAAAGAAAAGAATAAGGACAATAAAAAGGATCTTATTACACAGGCCACCTTGTTGTATACAATGGCCGATAAAATTATTATGTATGA…
CEMC7_RP_hgx1880v1_pB27_A-111	3p	28874461	Homo sapiens - EID1	GID: 44680150	EID1; [gi|44680150|ref|NM_014335.2| Homo sapiens EP300 interacting inhibitor of differentiation 1 (EID1), mRNA]	No Data	536	??	Sense		88.6				ATTTTTTTCTTTCTCTCGCCGATTCTCCTCCCGCACCCCCTCTATCGTTTTTTATAAAAAGCTGTATATGGGCTTCATGATGTCGATAAACGATCAGTGTTATGATGGAGATGCCGTTCAAACCCAAGACAGTGATTCTAGATCTAGCCATGGCAGGGGGAACTCGGAGCTGTATGTCGAGAGCGTGCTCCGCAGAGGGCTCTGGGGCTGCCGAAGGGTACCTTCCGCTCAGGAGGTAGGCAGCGGGAGCGGGAAGATATCTCCGATCCCTCCCGCAGGTGGGACGGGGGCTCGAGGAGGGCATCCCAAAGGAGGAGGAGGGGGCCCGTCCTATTGTGGTGCCAAAGGGGAAATGGAGTCTTTCTAAAGGGGCCAACGCTGGGGAGCAGCCAGGCCAGG…
CEMC7_RP_hgx1880v1_pB27_A-17	5p 3p	28874461	Homo sapiens - EID1	GID: 44680150	EID1; [gi|44680150|ref|NM_014335.2| Homo sapiens EP300 interacting inhibitor of differentiation 1 (EID1), mRNA]	27	537	IF	Sense		98.2 / 99.6			GCAGTATGAAGAGAGCAGTGACCTGCAGATGGATGTGATGCCTGGCGAGGGTGACCTTCCGCAGATGGAGGTAGGCAGCGGGAGCCGGGAGCTATCCCTGCGTCCCTCCCGCAGCGGGGCCCAACAGCTCGAGGAGGAAGGCCCAATGGAGGAGGAGGAGGCCCAGCCAATGGCGGCGCCAGAGGGGAAACGGAGCCTTGCTAACGGGCCCAACGCTGGGGAGCAGCCAGGCCAGGTGGCGGGCGCAGACTTCGAGAGCGAGGACGAGGGCGAGGAATTTGATGACTGGGAGGACGACTACTACTATCCCGAAGAGGAGCAGCTCAGTGGTGCCGGCTACAGAGTATCAGCCGCTCTTGAAGAAGCCGACTAGATGTTTCTGAGAACAAGAGAACCAGC…	GCTGTATGAAGAGAGCAGTGACCTGCAGATGGATGTGATGCCTGGCGAGGGTGACCTTCCGCAGATGGAGGTAGGCAGCGGGAGCCGGGAGCTATCCCTGCGTCCCTCCCGCAGCGGGGCCCAACAGCTCGAGGAGGAAGGCCCAATGGAGGAGGAGGAGGCCCAGCCAATGGCGGCGCCAGAGGGGAAACGGAGCCTTGCTAACGGGCCCAACGCTGGGGAGCAGCCAGGCCAGGTGGCGGGCGCAGACTTCGAGAGCGAGGACGAGGGCGAGGAATTTGATGACTGGGAGGACGACTACGACTATCCCGAAGAGGAGCAGCTCAGTGGTGCCGGCTACAGAGTATCAGCCGCTCTTGAAGAAGCCGACAAGATGTTTCTGAGAACAAGAGAACCAGC…	GCTGTATGAAGAGAGCAGTGACCTGCAGATGGATGTGATGCCTGGCGAGGGTGACCTTCCGCAGATGGAGGTAGGCAGCGGGAGCCGGGAGCTATCCCTGCGTCCCTCCCGCAGCGGGGCCCAACAGCTCGAGGAGGAAGGCCCAATGGAGGAGGAGGAGGCCCAGCCAATGGCGGCGCCAGAGGGGAAACGGAGCCTTGCTAACGGGCCCAACGCTGGGGAGCAGCCAGGCCAGGTGGCGGGCGCAGACTTCGAGAGCGAGGACGAGGGCGAGGAATTTGATGACTGGGAGGACGACTACGACTATCCCGAAGAGGAGCAGCTCAGTGGTGCCGGCTACAGAGTATCAGCCGCTCTTGAAGAAGCCGACAAGATGTTTCTGAGAACAAGAGAACCAGC…
CEMC7_RP_hgx1880v1_pB27_A-112	5p	28874461	Homo sapiens - EID1	GID: 44680150	EID1; [gi|44680150|ref|NM_014335.2| Homo sapiens EP300 interacting inhibitor of differentiation 1 (EID1), mRNA]	27	No Data	IF	Sense		97.7			GCTGTATGAAGAGAGCAGTGACCTGCAGATGGATGTGATGCCTGGCGAGGGTGACCTTCCGCAGATGGAGGTAGGCAGCGGGAGCCGGGAGCTATCCCTGCGTCCCTCCCGCAGCGGGGCCCAACAGCTCGAGGAGGAAGGCCCAATGGAGGAGGAGGAGGCCCAGCCAATGGCGGCGCCAGAGGGGAAACGGAGCCTTGCTAACGGGCCCAACGCCGGGGAGCAGCCAGGCCAGGTGGCGGGCGCAGACTTCAAGAGCGAGGACGAGGGCGAGGAATTTGATGACTGGGAGGACAACTACAACTATCCCGAAGAGGAGCAACTCAGTGGTGCCGGCTACAGAATATCAACCGCTCTTGAAGAAGCCGACAAGATGTTTCTGAGAACAAGAGAACCAGC…
CEMC7_RP_hgx1880v1_pB27_A-121	5p 3p	28874461	Homo sapiens - EID1	GID: 44680150	EID1; [gi|44680150|ref|NM_014335.2| Homo sapiens EP300 interacting inhibitor of differentiation 1 (EID1), mRNA]	27	537	IF	Sense		92.0 / 99.6			GCATTATGAAGAGAGCAGTGACCTGCAGATGGATGTGATGCCTGGCGAGGGTGACCTTCCGCAGATGGAGGTAGGCAGCGGGAGCCGGGAGCCTTCCCAGCGTCCCTCCCGCAGCGGGGCCCAACAGCACGAGGAGGAAGGCCCAATGGAGGAGGAGGAGGCCCAGCCAATGGCGGCGCCAGAGGGGAAACGGAGCCCAGCTAACGGGCCCAACGCTGGGGAGCAGCCAGGCCAGGGGGCGGGCGCATACGGCGAGAGCGAGGACGAGGGCGAGGAAGGGATGACTGGGAGGACGACTACTACTAGCCCGAAGAGGAGCAGCGCATTGGGGCCGGCTACAGAGTATCAGCCGCTCGGAAGAAGCCGACTTGATGGGCGGAGAACAAGAGAACCAGCCCT…	GCTGTATGAAGAGAGCAGTGACCTGCAGATGGATGTGATGCCTGGCGAGGGTGACCTTCCGCAGATGGAGGTAGGCAGCGGGAGCCGGGAGCTATCCCTGCGTCCCTCCCGCAGCGGGGCCCAACAGCTCGAGGAGGAAGGCCCAATGGAGGAGGAGGAGGCCCAGCCAATGGCGGCGCCAGAGGGGAAACGGAGCCTTGCTAACGGGCCCAACGCTGGGGAGCAGCCAGGCCAGGTGGCGGGCGCAGACTTCGAGAGCGAGGACGAGGGCGAGGAATTTGATGACTGGGAGGACGACTACGACTATCCCGAAGAGGAGCAGCTCAGTGGTGCCGGCTACAGAGTATCAGCCGCTCTTGAAGAAGCCGACAAGATGTTTCTGAGAACAAGAGAACCAGC…	GCTGTATGAAGAGAGCAGTGACCTGCAGATGGATGTGATGCCTGGCGAGGGTGACCTTCCGCAGATGGAGGTAGGCAGCGGGAGCCGGGAGCTATCCCTGCGTCCCTCCCGCAGCGGGGCCCAACAGCTCGAGGAGGAAGGCCCAATGGAGGAGGAGGAGGCCCAGCCAATGGCGGCGCCAGAGGGGAAACGGAGCCTTGCTAACGGGCCCAACGCTGGGGAGCAGCCAGGCCAGGTGGCGGGCGCAGACTTCGAGAGCGAGGACGAGGGCGAGGAATTTGATGACTGGGAGGACGACTACGACTATCCCGAAGAGGAGCAGCTCAGTGGTGCCGGCTACAGAGTATCAGCCGCTCTTGAAGAAGCCGACAAGATGTTTCTGAGAACAAGAGAACCAGC…
CEMC7_RP_hgx1880v1_pB27_A-93	5p 3p	28874461	Homo sapiens - EID1	GID: 44680150	EID1; [gi|44680150|ref|NM_014335.2| Homo sapiens EP300 interacting inhibitor of differentiation 1 (EID1), mRNA]	27	537	IF	Sense		100.0 / 100.0			GCTGTATGAAGAGAGCAGTGACCTGCAGATGGATGTGATGCCTGGCGAGGGTGACCTTCCGCAGATGGAGGTAGGCAGCGGGAGCCGGGAGCTATCCCTGCGTCCCTCCCGCAGCGGGGCCCAACAGCTCGAGGAGGAAGGCCCAATGGAGGAGGAGGAGGCCCAGCCAATGGCGGCGCCAGAGGGGAAACGGAGCCTTGCTAACGGGCCCAACGCTGGGGAGCAGCCAGGCCAGGTGGCGGGCGCAGACTTCGAGAGCGAGGACGAGGGCGAGGAATTTGATGACTGGGAGGACGACTACGACTATCCCGAAGAGGAGCAGCTCAGTGGTGCCGGCTACAGAGTATCAGCCGCTCTTGAAGAAGCCGACAAGATGTTTCTGAGAACAAGAGAACCAGC…	GCTGTATGAAGAGAGCAGTGACCTGCAGATGGATGTGATGCCTGGCGAGGGTGACCTTCCGCAGATGGAGGTAGGCAGCGGGAGCCGGGAGCTATCCCTGCGTCCCTCCCGCAGCGGGGCCCAACAGCTCGAGGAGGAAGGCCCAATGGAGGAGGAGGAGGCCCAGCCAATGGCGGCGCCAGAGGGGAAACGGAGCCTTGCTAACGGGCCCAACGCTGGGGAGCAGCCAGGCCAGGTGGCGGGCGCAGACTTCGAGAGCGAGGACGAGGGCGAGGAATTTGATGACTGGGAGGACGACTACGACTATCCCGAAGAGGAGCAGCTCAGTGGTGCCGGCTACAGAGTATCAGCCGCTCTTGAAGAAGCCGACAAGATGTTTCTGAGAACAAGAGAACCAGC…	GCTGTATGAAGAGAGCAGTGACCTGCAGATGGATGTGATGCCTGGCGAGGGTGACCTTCCGCAGATGGAGGTAGGCAGCGGGAGCCGGGAGCTATCCCTGCGTCCCTCCCGCAGCGGGGCCCAACAGCTCGAGGAGGAAGGCCCAATGGAGGAGGAGGAGGCCCAGCCAATGGCGGCGCCAGAGGGGAAACGGAGCCTTGCTAACGGGCCCAACGCTGGGGAGCAGCCAGGCCAGGTGGCGGGCGCAGACTTCGAGAGCGAGGACGAGGGCGAGGAATTTGATGACTGGGAGGACGACTACGACTATCCCGAAGAGGAGCAGCTCAGTGGTGCCGGCTACAGAGTATCAGCCGCTCTTGAAGAAGCCGACAAGATGTTTCTGAGAACAAGAGAACCAGC…
CEMC7_RP_hgx1880v1_pB27_A-50	5p 3p	28874461	Homo sapiens - EID1	GID: 44680150	EID1; [gi|44680150|ref|NM_014335.2| Homo sapiens EP300 interacting inhibitor of differentiation 1 (EID1), mRNA]	27	537	IF	Sense		99.8 / 100.0			GCTGTATGAAGAGAGCAGTGACCTGCAGATGGATGTGATGCCTGGCGAGGGTGACCTTCCGCAGATGGAGGTAGGCAGCGGGAGCCGGGAGCTATCCCTGCGTCCCTCCCGCAGCGGGGCCCAACAGCTCGAGGAGGAAGGCCCAATGGAGGAGGAGGAGGCCCAGCCAATGGCGGCGCCAGAGGGGAAACGGAGCCTTGCTAACGGGCCCAACGCTGGGGAGCAGCCAGGCCAGGTGGCGGGCGCAGACTTCGAGAGCGAGGACGAGGGCGAGGAATTTGATGACTGGGAGGACGACTACGACTATCCCGAAGAGGAGCAGCTCAGTGGTGCCGGCTACAGAGTATCAGCCGCTCTTGAAGAAGCCGACATGATGTTTCTGAGAACAAGAGAACCAGC…	GCTGTATGAAGAGAGCAGTGACCTGCAGATGGATGTGATGCCTGGCGAGGGTGACCTTCCGCAGATGGAGGTAGGCAGCGGGAGCCGGGAGCTATCCCTGCGTCCCTCCCGCAGCGGGGCCCAACAGCTCGAGGAGGAAGGCCCAATGGAGGAGGAGGAGGCCCAGCCAATGGCGGCGCCAGAGGGGAAACGGAGCCTTGCTAACGGGCCCAACGCTGGGGAGCAGCCAGGCCAGGTGGCGGGCGCAGACTTCGAGAGCGAGGACGAGGGCGAGGAATTTGATGACTGGGAGGACGACTACGACTATCCCGAAGAGGAGCAGCTCAGTGGTGCCGGCTACAGAGTATCAGCCGCTCTTGAAGAAGCCGACAAGATGTTTCTGAGAACAAGAGAACCAGC…	GCTGTATGAAGAGAGCAGTGACCTGCAGATGGATGTGATGCCTGGCGAGGGTGACCTTCCGCAGATGGAGGTAGGCAGCGGGAGCCGGGAGCTATCCCTGCGTCCCTCCCGCAGCGGGGCCCAACAGCTCGAGGAGGAAGGCCCAATGGAGGAGGAGGAGGCCCAGCCAATGGCGGCGCCAGAGGGGAAACGGAGCCTTGCTAACGGGCCCAACGCTGGGGAGCAGCCAGGCCAGGTGGCGGGCGCAGACTTCGAGAGCGAGGACGAGGGCGAGGAATTTGATGACTGGGAGGACGACTACGACTATCCCGAAGAGGAGCAGCTCAGTGGTGCCGGCTACAGAGTATCAGCCGCTCTTGAAGAAGCCGACAAGATGTTTCTGAGAACAAGAGAACCAGC…
CEMC7_RP_hgx1880v1_pB27_A-80	5p 3p	28874461	Homo sapiens - EID1	GID: 44680150	EID1; [gi|44680150|ref|NM_014335.2| Homo sapiens EP300 interacting inhibitor of differentiation 1 (EID1), mRNA]	27	537	IF	Sense		100.0 / 100.0			GCTGTATGAAGAGAGCAGTGACCTGCAGATGGATGTGATGCCTGGCGAGGGTGACCTTCCGCAGATGGAGGTAGGCAGCGGGAGCCGGGAGCTATCCCTGCGTCCCTCCCGCAGCGGGGCCCAACAGCTCGAGGAGGAAGGCCCAATGGAGGAGGAGGAGGCCCAGCCAATGGCGGCGCCAGAGGGGAAACGGAGCCTTGCTAACGGGCCCAACGCTGGGGAGCAGCCAGGCCAGGTGGCGGGCGCAGACTTCGAGAGCGAGGACGAGGGCGAGGAATTTGATGACTGGGAGGACGACTACGACTATCCCGAAGAGGAGCAGCTCAGTGGTGCCGGCTACAGAGTATCAGCCGCTCTTGAAGAAGCCGACAAGATGTTTCTGAGAACAAGAGAACCAGC…	GCTGTATGAAGAGAGCAGTGACCTGCAGATGGATGTGATGCCTGGCGAGGGTGACCTTCCGCAGATGGAGGTAGGCAGCGGGAGCCGGGAGCTATCCCTGCGTCCCTCCCGCAGCGGGGCCCAACAGCTCGAGGAGGAAGGCCCAATGGAGGAGGAGGAGGCCCAGCCAATGGCGGCGCCAGAGGGGAAACGGAGCCTTGCTAACGGGCCCAACGCTGGGGAGCAGCCAGGCCAGGTGGCGGGCGCAGACTTCGAGAGCGAGGACGAGGGCGAGGAATTTGATGACTGGGAGGACGACTACGACTATCCCGAAGAGGAGCAGCTCAGTGGTGCCGGCTACAGAGTATCAGCCGCTCTTGAAGAAGCCGACAAGATGTTTCTGAGAACAAGAGAACCAGC…	GCTGTATGAAGAGAGCAGTGACCTGCAGATGGATGTGATGCCTGGCGAGGGTGACCTTCCGCAGATGGAGGTAGGCAGCGGGAGCCGGGAGCTATCCCTGCGTCCCTCCCGCAGCGGGGCCCAACAGCTCGAGGAGGAAGGCCCAATGGAGGAGGAGGAGGCCCAGCCAATGGCGGCGCCAGAGGGGAAACGGAGCCTTGCTAACGGGCCCAACGCTGGGGAGCAGCCAGGCCAGGTGGCGGGCGCAGACTTCGAGAGCGAGGACGAGGGCGAGGAATTTGATGACTGGGAGGACGACTACGACTATCCCGAAGAGGAGCAGCTCAGTGGTGCCGGCTACAGAGTATCAGCCGCTCTTGAAGAAGCCGACAAGATGTTTCTGAGAACAAGAGAACCAGC…
CEMC7_RP_hgx1880v1_pB27_A-76	5p	28874461	Homo sapiens - EID1	GID: 44680150	EID1; [gi|44680150|ref|NM_014335.2| Homo sapiens EP300 interacting inhibitor of differentiation 1 (EID1), mRNA]	27	No Data	IF	Sense		100.0			GCTGTATGAAGAGAGCAGTGACCTGCAGATGGATGTGATGCCTGGCGAGGGTGACCTTCCGCAGATGGAGGTAGGCAGCGGGAGCCGGGAGCTATCCCTGCGTCCCTCCCGCAGCGGGGCCCAACAGCTCGAGGAGGAAGGCCCAATGGAGGAGGAGGAGGCCCAGCCAATGGCGGCGCCAGAGGGGAAACGGAGCCTTGCTAACGGGCCCAACGCTGGGGAGCAGCCAGGCCAGGTGGCGGGCGCAGACTTCGAGAGCGAGGACGAGGGCGAGGAATTTGATGACTGGGAGGACGACTACGACTATCCCGAAGAGGAGCAGCTCAGTGGTGCCGGCTACAGAGTATCAGCCGCTCTTGAAGAAGCCGACAAGATGTTTCTGAGAACAAGAGAACCAGC…
CEMC7_RP_hgx1880v1_pB27_A-35	5p 3p	28874400	Homo sapiens - HEATR3	GID: 90819240	HEATR3; [gi|90819240|ref|NM_182922.2| Homo sapiens HEAT repeat containing 3 (HEATR3), mRNA]	1413	2070	IF	Sense		99.8 / 99.8			GAGTCTTGTGTCCCTCCTGGATGTGGAGCACCTGGGAGGAGCCGCAGCCCTTCAGACGCTTGCACAGCATCTGTCACAGCTGTTTTTTTCTCAACCAGATTTTGCTAAACATGTTGACTTTCTAGAAGCCATAAGTAGTGCTTTGAGGGCCCTTTTGCAAACAATGGCCTCCAAGAACATTTCCCAGTGCATGACTCCTGATCAGCTGATGACATTATGCAAAGCAGGCATTCATAGTAGTAATGTCGGGGTTAGAGTGAATGTCGTTAGCATTTTAGGAATCACTGGCAGCGTCCTTGCCAAAGAAGATGGTACACTTGAAACTCTTAAGAACATTGGGTGCTTTCTGCTTGAAGTTACCACCAAAGATCCTTCCCTTGTGGTAGCAGGAGAAGCTTT…	CACCTGGGAGGAGCCGCAGCCCTTCAGACGCTTGCACAGCATCTGTCACAGCTGTTTTTTTCTCAACCAGATTTTGCTAAACATGTTGACTTTCTAGAAGCCATAAGTAGTGCTTTGAGGGCCCTTTTGCAAACAATGGCCTCCAAGAACATTTCCCAGTGCATGACTCCTGATCAGCTGATGACATTATGCAAAGCAGGCATTCATAGTAGTAATGTCGGGGTTAGAGTGAATGTCGTTAGCATTTTAGGAATCACTGGCAGCGTCCTTGCCAAAGAAGATGGTACACTTGAAACTCTTAAGAACATTGGGTGCTTTCTGCTTGAAGTTACCACCAAAGATCCTTCCCTTGTGGTAGCAGGAGAAGCTTTGGATGCCCTCTTTGATGTTTTTGCAGAT…	GAGTCTTGTGTCCCTCCTGGATGTGGAGCACCTGGGAGGAGCCGCAGCCCTTCAGACGCTTGCACAGCATCTGTCACAGCTGCTTTTTTCTCAACCAGATTTTGCTAAACATGTTGACTTTCTAGAAGCCATAAGTAGTGCTTTGAGGGCCCTTTTGCAAACAATGGCCTCCAAGAACATTTCCCAGTGCATGACTCCTGATCAGCTGATGACATTATGCAAAGCAGGCATTCATAGTAGTAATGTCGGGGTTAGAGTGAATGTCGTTAGCATTTTAGGAATCACTGGCAGCGTCCTTGCCAAAGAAGATGGTACACTTGAAACTCTTAAGAACATTGGGTGCTTTCTGCTTGAAGTTACCACCAAAGATCCTTCCCTTGTGGTAGCAGGAGAAGCTTT…
CEMC7_RP_hgx1880v1_pB27_A-74	5p 3p	28874344	Homo sapiens - IVNS1ABP	GID: 54144638	IVNS1ABP; [gi|54144638|ref|NM_006469.4| Homo sapiens influenza virus NS1A binding protein (IVNS1ABP), transcript variant 1, mRNA]	1320	2193	IF	Sense		86.4 / 99.4			AGATGACTGGATTCCTGTTCCAGAATTGAGAACTAACCGTTGTAATGCAGGAGTGTGTGCTCTGAATGGAAAGTTATACATCGTTGGTGGCTCTGATCCATATGGTCAAAAAGGACTGAAAAATTGTGATGTATTTGATCCTGTAACACAGTTGTGGACAAGCTGTGCCCCTCTTAACATTCGGAAACACCAGTCTGCAGTCTGTGAGCTTGGTGGTTATTTGTACCTAATCGGATGTGCACAATCTTGGAATTGTCTGAACACAAAAGAACGATACAATCCTGAAAATAATACCTGGACTTTAATTGCACCCATGAATGTGGCTAGGCGAGGAGCTGGAGTGGCTGTTCTTAATGGAAAACTGTTTGTATGTGGTGGCTTTGATGGTTGTCATGCCAT…	GTTATTTTGTACATAAATCGGAGGTGCAGAATCTTGGAATTGTCTGAACACAGTAGAACGATACAATCCTGAAAATAATACTGGACTTTAATTGCACCCATGAATGTGGCTAGGCGAGGAGCTGGAGTGGCTGTTCTTAATGGAAAACTGTTTGTATGTGGTGGCTTTGATGGTTCTCATGCCATCAGTTGTGTGGAAATGTATGATCCAACTAGAAATGAATGGAAGATGATGGGAAATATGACTTCACCAAGGAGCAATGCTGGGATTGCAACTGTAGGGAACACCATTTATGCAGTGGGAGGATTCGATGGCAATGAATTTCTGAATACGGTGGAAGTCTATAACCTTGAGTCAAATGAATGGAGCCCCTATACAAAGATTTTCCAGTTTTAACAA…	AGATGACTGGATTCCTGTTCCAGAATTGAGAACTAACCGTTGTAATGCAGGAGTGTGTGCTCTGAATGGAAAGTTATACATCGTTGGTGGCTCTGATCCATATGGTCAAAAAGGACTGAAAAATTGTGATGTATTTGATCCTGTAACAAAGTTGTGGACAAGCTGTGCCCCTCTTAACATTCGGAGACACCAGTCTGCAGTCTGTGAGCTTGGTGGTTATTTGTACATAATCGGAGGTGCAGAATCTTGGAATTGTCTGAACACAGTAGAACGATACAATCCTGAAAATAATACCTGGACTTTAATTGCACCCATGAATGTGGCTAGGCGAGGAGCTGGAGTGGCTGTTCTTAATGGAAAACTGTTTGTATGTGGTGGCTTTGATGGTTCTCATGCCAT…
CEMC7_RP_hgx1880v1_pB27_A-108	5p 3p	28874344	Homo sapiens - IVNS1ABP	GID: 54144638	IVNS1ABP; [gi|54144638|ref|NM_006469.4| Homo sapiens influenza virus NS1A binding protein (IVNS1ABP), transcript variant 1, mRNA]	1326	2193	IF	Sense		99.3 / 99.2			CTGGATTCCTGTTCCAGAATTGAGAACTAACCGTTGTAATGCAGGAGTGTGTGCTCTGAATGGAAAGTTATACATCGTTGGTGGCTCTGATCCATATGGTCAAAAAGGACTGAAAAATTGTGATGTATTTGATCCTGTAACAAAGTTGTGGACAAGCTGTGCCCCTCTTAACATTCGGAGACACCAGTCTGCAGTCTGTGAGCTTGGTGGTTATTTGTACATAATCGGAGGTGCAGAATCTTGGAATTGTCTGAACACAGTAGAACGATACAATCCTGAAAATAATACCTGGACTTTAATTGCACCCATGAATGTGGCTAGGCGAGGAGCTGGAGTGGCTGTTCTTAATGGAAAACTGTTTGTATGTGGTGGCTTTGATGGTTCTCATGCCATCAGTTG…	TTGGTGGGTATTTGTACATAATCGGAGGTGCAGAATCTGGGAATGTCTGAACACAGTAGAACGATACAATCTGAAAATAATACCTGGACTTTAATTGCACCCATGAATGTGGCTAGGCGAGGAGCCGGAGTGGCTGTTCTTAATGGAAAACTGTTTGTATGTGGTGGCTTTGATGGTTCTCATGCCATCAGTTGTGTGGAAATGTATGATCCAACTAGAAATGAATGGAAGATGATGGGAAATATGACTTCACCAAGGAGCAATGCTGGGATTGCAACTGTAGGGAACACCATTTATGCAGTGGGAGGATTCGATGGCAATGAATTTCTGAATACGGTGGAAGTCTATAACCTTGAGTCAAATGAATGGAGCCCCTATACAAAGATTTTCCAGTTTTAA…	CTGGATTCCTGTTCCAGAATTGAGAACTAACCGTTGTAATGCAGGAGTGTGTGCTCTGAATGGAAAGTTATACATCGTTGGTGGCTCTGATCCATATGGTCAAAAAGGACTGAAAAATTGTGATGTATTTGATCCTGTAACAAAGTTGTGGACAAGCTGTGCCCCTCTTAACATTCGGAGACACCAGTCTGCAGTCTGTGAGCTTGGTGGTTATTTGTACATAATCGGAGGTGCAGAATCTTGGAATTGTCTGAACACAGTAGAACGATACAATCCTGAAAATAATACCTGGACTTTAATTGCACCCATGAATGTGGCTAGGCGAGGAGCTGGAGTGGCTGTTCTTAATGGAAAACTGTTTGTATGTGGTGGCTTTGATGGTTCTCATGCCATCAGTTG…
CEMC7_RP_hgx1880v1_pB27_A-27	5p 3p	28874344	Homo sapiens - IVNS1ABP	GID: 54144638	IVNS1ABP; [gi|54144638|ref|NM_006469.4| Homo sapiens influenza virus NS1A binding protein (IVNS1ABP), transcript variant 1, mRNA]	1326	2193	IF	Sense		98.8 / 98.5			CTGGATTCCTGTTCCAGAATTGATAACTAACCGTTGTAATGCAGGAGTGTGTGCTCTGAATGGAAAGTTATACATCGTTGGTGGCTCTGATCCATATGGTCAAAAAGGACTGAAAAATTGTGATGTATTTGATCCTGTAACAAAGTTGTGGACAAGCTGTGCCCCTCTTAACATTCGGAGACACCTGTCTGCAGTCTGTGAGCTTGGTGGTTATTTGTACATAATCGGAGGTGCAGAATCTTGGAATTGTCTGAACACAGTAGAACGATACAATCCTGAAAATAATACCTGGACTTTAATTGCACCCATGAATGTGGCTAGGCGAGGAGCTGGAGTGGCTGTTCTTAATGGAAAACTGTTTGTATGTGGTGGCTTTGATGGTTCTCATGCCATCAGTTG…	TGGGTGGTTAATTGTACATAATTGGAGGTGCAGAATCCTGGAATTGTCTGAACACAGTAGATCGATACAATCCTGAAAATAATACCTGGACTTTAATTGCACCCATGAATGTGGCTAGGCGAGGAGCTGGAGTGGCTGTTCTTAATGGAAAACTGTTTGTATGTGGTGGCTTTGATGGTTCTCATGCCATCAGTTGTGTGGAAATGTATGATCCAACTAGAAATGAATGGAAGATGATGGGAAATATGACTTCACCAAGGAGCAATGCTGGGATTGCAAATGTAGGGAACACCATTTATGCAGTGGGAGGATTTGATGGCAATGAATTTCTGAATACGGTGGAAGTCTATAACCGTGAGTCAAATGAATGGAGCCCCTATACAAAGATTTTCCAGTTTT…	CTGGATTCCTGTTCCAGAATTGAGAACTAACCGTTGTAATGCAGGAGTGTGTGCTCTGAATGGAAAGTTATACATCGTTGGTGGCTCTGATCCATATGGTCAAAAAGGACTGAAAAATTGTGATGTATTTGATCCTGTAACAAAGTTGTGGACAAGCTGTGCCCCTCTTAACATTCGGAGACACCAGTCTGCAGTCTGTGAGCTTGGTGGTTATTTGTACATAATCGGAGGTGCAGAATCTTGGAATTGTCTGAACACAGTAGAACGATACAATCCTGAAAATAATACCTGGACTTTAATTGCACCCATGAATGTGGCTAGGCGAGGAGCTGGAGTGGCTGTTCTTAATGGAAAACTGTTTGTATGTGGTGGCTTTGATGGTTCTCATGCCATCAGTTG…
CEMC7_RP_hgx1880v1_pB27_A-15	5p 3p	28874344	Homo sapiens - IVNS1ABP	GID: 54144638	IVNS1ABP; [gi|54144638|ref|NM_006469.4| Homo sapiens influenza virus NS1A binding protein (IVNS1ABP), transcript variant 1, mRNA]	1326	2193	IF	Sense		99.8 / 99.8			CTGGATTCCTGTTCCAGAATTGAGAACTAACCGTTGTAATGCAGGAGTGTGTGCTCTGAATGGAAAGTTATACATCGTTGGTGGCTCTGATCCATATGGTCAAAAAGGACTGAAAAATTGTGATGTATTTGATCCTGTAACAAAGTTGTGGACAAGCTGTGCCCCTCTTAACATTCGGAGACACCAGTCTGCAGTCTGTGAGCTTGGTGGTTATTTGTACATAATCGGAGGTGCAGAATCTTGGAATTGTCTGAACACAGTAGAACGATACAATCCTGAAAATAATACCTGGACTTTAATTGCACCCATGAATGTGGCTAGGCGAGGAGCTGGAGTGGCTGTTCTTAATGGAAAACTGTTTGTATGTGGTGGCTTTGATGGTTCTCATGCCATCAGTTG…	GGGTGGTTATTTGTACATAATCGGAGGTGCAGAATCTTGGAATTGTCTGAACACAGTAGAACGATACAATCCTGAAAATAATACTGGACTTTAATTGCACCCATGAATGTGGCTAGGCGAGGAGCTGGAGTGGCTGTTCTTAATGGAAAACTGTTTGTATGTGGTGGCTTTGATGGTTCTCATGCCATCAGTTGTGTGGAAATGTATGATCCAACTAGAAATGAATGGAAGATGATGGGAAATATGACTTCACCAAGGAGCAATGCTGGGATTGCAACTGTAGGGAACACCATTTATGCAGTGGGAGGATTCGATGGCAATGAATTTCTGAATACGGTGGAAGTCTATAACCTTGAGTCAAATGAATGGAGCCCCTATACAAAGATTTTCCAGTTTTAA…	CTGGATTCCTGTTCCAGAATTGAGAACTAACCGTTGTAATGCAGGAGTGTGTGCTCTGAATGGAAAGTTATACATCGTTGGTGGCTCTGATCCATATGGTCAAAAAGGACTGAAAAATTGTGATGTATTTGATCCTGTAACAAAGTTGTGGACAAGCTGTGCCCCTCTTAACATTCGGAGACACCAGTCTGCAGTCTGTGAGCTTGGTGGTTATTTGTACATAATCGGAGGTGCAGAATCTTGGAATTGTCTGAACACAGTAGAACGATACAATCCTGAAAATAATACCTGGACTTTAATTGCACCCATGAATGTGGCTAGGCGAGGAGCTGGAGTGGCTGTTCTTAATGGAAAACTGTTTGTATGTGGTGGCTTTGATGGTTCTCATGCCATCAGTTG…
CEMC7_RP_hgx1880v1_pB27_A-45	5p 3p	28874375	Homo sapiens - JARID1A	GID: 110618243	JARID1A; [gi|110618243|ref|NM_001042603.1| Homo sapiens Jumonji, AT rich interactive domain 1A (RBBP2-like) (JARID1A), transcript variant 1, mRNA]	3558	4415	IF	Sense		99.9 / 100.0			CAGCTGTGTTCCTCTTCCTAAATCAAGTTCCCAAAAAAAAGGATCCAGCTGGCAAGCTAAAGAAGTAAAATTCCTTTGCCCTCTTTGTATGCGGTCTCGAAGGCCCAGGCTAGAGACTATTCTGTCACTCCTGGTATCCCTTCAGAAGTTGCCCGTACGGTTGCCTGAAGGAGAGGCCCTGCAGTGTTTGACAGAACGTGCTATGAGTTGGCAAGATAGAGCGCGGCAGGCTCTAGCCACAGATGAACTATCCTCTGCCCTGGCCAAACTATCTGTGTTGAGCCAGCGTATGGTGGAACAGGCGGCTCGAGAAAAAACTGAAAAGATCATCAGTGCAGAACTCCAAAAAGCAGCTGCCAATCCAGACTTACAGGGACACTTACCTAGTTTCCAGCAGTC…	GCAGTGTTTGACAGAACGTGCTATGAGTTGGCAAGATAGAGCGCGGCAGGCTCTAGCCACAGATGAACTATCCTCTGCCCTGGCCAAACTATCTGTGTTGAGCCAGCGTATGGTGGAACAGGCGGCTCGAGAAAAAACTGAAAAGATCATCAGTGCAGAACTCCAAAAAGCAGCTGCCAATCCAGACTTACAGGGACACTTACCTAGTTTCCAGCAGTCTGCTTTTAACCGGGTGGTGAGCAGTGTGTCATCTTCTCCTCGACAAACAATGGACTATGATGATGAAGAAACAGACTCTGATGAAGACATTCGAGAGACATATGGCTACGACATGAAGGACACAGCCAGTGTGAAGTCCTCTAGTAGTCTTGAACCCAATCTTTTTTGTGATGAAGAGAT…	CAGCTGTGTTCCTCTTCCTAAATCAAGTTCCCAAAAAAAAGGATCCAGCTGGCAAGCTAAAGAAGTAAAATTCCTTTGCCCTCTTTGTATGCGGTCTCGAAGGCCCAGGCTAGAGACTATTCTGTCACTCCTGGTATCCCTTCAGAAGTTGCCCGTACGGTTGCCTGAAGGAGAGGCCCTGCAGTGTTTGACAGAACGTGCTATGAGTTGGCAAGATAGAGCGCGGCAGGCTCTAGCCACAGATGAACTATCCTCTGCCCTGGCCAAACTATCTGTGTTGAGCCAGCGTATGGTGGAACAGGCGGCTCGAGAAAAAACTGAAAAGATCATCAGTGCAGAACTCCAAAAAGCAGCTGCCAATCCAGACTTACAGGGACACTTACCTAGTTTCCAGCAGTC…
CEMC7_RP_hgx1880v1_pB27_A-70	5p 3p	28874349	Homo sapiens - LMNB1	GID: 27436949	LMNB1; [gi|27436949|ref|NM_005573.2| Homo sapiens lamin B1 (LMNB1), mRNA]	132	651	IF	Sense		100.0 / 100.0			GGTGTACATCGACAAGGTGCGCAGCCTGGAGACGGAGAACAGCGCGCTGCAGCTGCAGGTGACGGAGCGCGAGGAGGTGCGCGGCCGTGAGCTCACCGGCCTCAAGGCGCTCTACGAGACCGAGCTGGCCGACGCGCGACGCGCGCTCGACGACACGGCCCGCGAGCGCGCCAAGCTGCAGATCGAGCTGGGCAAGTGCAAGGCGGAACACGACCAGCTGCTCCTCAACTATGCTAAGAAGGAATCTGATCTTAATGGCGCCCAGATCAAGCTTCGAGAATATGAAGCAGCACTGAATTCGAAAGATGCAGCTCTTGCTACTGCACTTGGTGACAAAAAAAGTTTAGAGGGAGATTTGGAGGATCTGAAGGATCAGATTGCCCAGTTGGAAGCCTCCTT…	AGGTGTACATCGACAAGGTGCGCAGCCTGGAGACGGAGAACAGCGCGCTGCAGCTGCAGGTGACGGAGCGCGAGGAGGTGCGCGGCCGTGAGCTCACCGGCCTCAAGGCGCTCTACGAGACCGAGCTGGCCGACGCGCGACGCGCGCTCGACGACACGGCCCGCGAGCGCGCCAAGCTGCAGATCGAGCTGGGCAAGTGCAAGGCGGAACACGACCAGCTGCTCCTCAACTATGCTAAGAAGGAATCTGATCTTAATGGCGCCCAGATCAAGCTTCGAGAATATGAAGCAGCACTGAATTCGAAAGATGCAGCTCTTGCTACTGCACTTGGTGACAAAAAAAGTTTAGAGGGAGATTTGGAGGATCTGAAGGATCAGATTGCCCAGTTGGAAGCCTCCT…	GGTGTACATCGACAAGGTGCGCAGCCTGGAGACGGAGAACAGCGCGCTGCAGCTGCAGGTGACGGAGCGCGAGGAGGTGCGCGGCCGTGAGCTCACCGGCCTCAAGGCGCTCTACGAGACCGAGCTGGCCGACGCGCGACGCGCGCTCGACGACACGGCCCGCGAGCGCGCCAAGCTGCAGATCGAGCTGGGCAAGTGCAAGGCGGAACACGACCAGCTGCTCCTCAACTATGCTAAGAAGGAATCTGATCTTAATGGCGCCCAGATCAAGCTTCGAGAATATGAAGCAGCACTGAATTCGAAAGATGCAGCTCTTGCTACTGCACTTGGTGACAAAAAAAGTTTAGAGGGAGATTTGGAGGATCTGAAGGATCAGATTGCCCAGTTGGAAGCCTCCTT…
CEMC7_RP_hgx1880v1_pB27_A-12	5p 3p	28874349	Homo sapiens - LMNB1	GID: 27436949	LMNB1; [gi|27436949|ref|NM_005573.2| Homo sapiens lamin B1 (LMNB1), mRNA]	134	651	OOF2	Sense		86.5 / 100.0			GGGACAGCGACAAGGTGCGCAGCCTGGAGACGGAGAACAGCGCGCGGCAGCGGCAGGGGACGGAGCGCGAGGAGGTGCGCGGCCGTGAGCTCACCGGCCTCAAGGCGCACACGAGACCGAGCTGGCCGACGCGCGACGCGCGCGCGACGACACGGCCCGCGAGCGCGCCAAGCGGCAGAGCGAGCGGGGCAAGGGCAAGGCGGAACACGACCAGTGGCGCCGCAACAGGCGAGAAGGAAGCGGAGCGAATGGCGCCCAGAGCAAGCGCGAGAAAGGAAGCAGCACGGAAGGCGAAAGAGGCAGCGCGGCTACTGCACGGGTGACAAAAAAAGGTAGAGGGAGAGGGGAGGATCGGAAGGATCATAGGGCCCATGGGAAGCCGTCGGAGCGGCAGCCAAA…	GGTGTACATCGACAAGGTGCGCAGCCTGGAGACGGAGAACAGCGCGCTGCAGCTGCAGGTGACGGAGCGCGAGGAGGTGCGCGGCCGTGAGCTCACCGGCCTCAAGGCGCTCTACGAGACCGAGCTGGCCGACGCGCGACGCGCGCTCGACGACACGGCCCGCGAGCGCGCCAAGCTGCAGATCGAGCTGGGCAAGTGCAAGGCGGAACACGACCAGCTGCTCCTCAACTATGCTAAGAAGGAATCTGATCTTAATGGCGCCCAGATCAAGCTTCGAGAATATGAAGCAGCACTGAATTCGAAAGATGCAGCTCTTGCTACTGCACTTGGTGACAAAAAAAGTTTAGAGGGAGATTTGGAGGATCTGAAGGATCAGATTGCCCAGTTGGAAGCCTCCTT…	TGTACATCGACAAGGTGCGCAGCCTGGAGACGGAGAACAGCGCGCTGCAGCTGCAGGTGACGGAGCGCGAGGAGGTGCGCGGCCGTGAGCTCACCGGCCTCAAGGCGCTCTACGAGACCGAGCTGGCCGACGCGCGACGCGCGCTCGACGACACGGCCCGCGAGCGCGCCAAGCTGCAGATCGAGCTGGGCAAGTGCAAGGCGGAACACGACCAGCTGCTCCTCAACTATGCTAAGAAGGAATCTGATCTTAATGGCGCCCAGATCAAGCTTCGAGAATATGAAGCAGCACTGAATTCGAAAGATGCAGCTCTTGCTACTGCACTTGGTGACAAAAAAAGTTTAGAGGGAGATTTGGAGGATCTGAAGGATCAGATTGCCCAGTTGGAAGCCTCCTTAG…
CEMC7_RP_hgx1880v1_pB27_A-48	5p 3p	28874366	Homo sapiens - ORC2L	GID: 32454751	ORC2L; [gi|32454751|ref|NM_006190.3| Homo sapiens origin recognition complex, subunit 2-like (yeast) (ORC2L), mRNA]	522	1283	IF	Sense		99.7 / 99.5			GTCTCATTCTGACAGTGAAAGCGAATATTCTGCTTCCAACTCAGAGGATGATGAAGGGGTTGCACAGGAACATGAAGAGGACACTAATGCAGTCATATTCAGCCAAAAGATTCAAGCTCAGAATAGAGTAGTTTCAGCTCCTGTTGGCAAAGAAACACCTTCTAAGAGAATGAAAAGAGATAAAACAAGTGACTTAGTAGAAGAATATTTTGAAGCTCACAGCATTTCAAAAGTTTTAACCTCTGATAGAACACTGCAGAAGCTAAAGAGAGCTAAACTGGATCAGCAAACTTTGCGTAACTTATTGAGCAAGGTTTCCCCTTCCTTTTCTGCCGAACTTAAACAACTAAATCAACAGTATGAAAAATTATTTCATAAATGGATGCTGCAATTACACCT…	TCAGCTCCTGTTGGGCAAAGAAACACTTTCTAAGAGAATGAAAAGAGATAAAACAAGTGACTTAGTAGAAGAATATTTTGAAGCTCACAGCAGTTCAAAAGTTTTAACCTCTGATAGAACACTGCAGAAGCTAAAGAGAGCTAAACTGGATCAGCAAACTTTGCGTAACTTATTGAGCAAGGTTTCCCCTTCCTTTTCTGCCGAACTTAAACAACTAAATCAACAGTATGAAAAATTATTTCATAAATGGATGCTGCAATTACACCTTGGGTTCAACATTGTGCTTTATGGTTTGGGTTCTAAGAGAGATTTACTAGAAAGGTTTCGAACCACTATGCTGCAAGATTCCATTCACGTTGTCATCAATGGCTTCTTTCCTGGAATCAGTGTGAAATCAGT…	GTCTCATTCTGACAGTGAAAGCGAATATTCTGCTTCCAACTCAGAGGATGATGAAGGGGTTGCACAGGAACATGAAGAGGACACTAATGCAGTCATATTCAGCCAAAAGATTCAAGCTCAGAATAGAGTAGTTTCAGCTCCTGTTGGCAAAGAAACACCTTCTAAGAGAATGAAAAGAGATAAAACAAGTGACTTAGTAGAAGAATATTTTGAAGCTCACAGCAGTTCAAAAGTTTTAACCTCTGATAGAACACTGCAGAAGCTAAAGAGAGCTAAACTGGATCAGCAAACTTTGCGTAACTTATTGAGCAAGGTTTCCCCTTCCTTTTCTGCCGAACTTAAACAACTAAATCAACAGTATGAAAAATTATTTCATAAATGGATGCTGCAATTACACCT…
CEMC7_RP_hgx1880v1_pB27_A-81	5p 3p	28874336	Homo sapiens - PHF20	GID: 110735447	PHF20; [gi|110735447|ref|NM_016436.4| Homo sapiens PHD finger protein 20 (PHF20), mRNA]	1698	2366	IF	Sense		99.7 / 100.0			GGAACCTTCTCCACCCAAGGCATTTGCTGTTACCAGGTGTGGGTCCTCACACAAGCCAGGGGTCCATATGAGCCCGCAGCTTCATGGCCCAGAATCTGGACACCACAAAGGGAAAGTGAAAGCATTGGAGGAGGATAATTTGAGTGAGTCCTCTTCTGAGAGCTTTCTCTGGAGTGATGATGAGTATGGCCAAGATGTGGATGTGACCACCAACCCAGATGAGGAACTTGATGGGGATGACCGCTATGACTTCGAGGTGGTCCGCTGCATCTGTGAGGTCCAGGAGGAAAATGACTTCATGATTCAGTGTGAAGAGTGCCAGTGCTGGCAGCATGGGGTCTGCATGGGATTACTGGAAGAAAATGTGCCCGAGAAATACACCTGTTATGTTTGCCAAGA…	GGCATTTGCTGTTACCAGGTGTGGGTCCTCACACAAGCCAGGGGTCCATATGAGCCCGCAGCTTCATGGCCCAGAATCTGGACACCACAAAGGGAAAGTGAAAGCATTGGAGGAGGATAATTTGAGTGAGTCCTCTTCTGAGAGCTTTCTCTGGAGTGATGATGAGTATGGCCAAGATGTGGATGTGACCACCAACCCAGATGAGGAACTTGATGGGGATGACCGCTATGACTTCGAGGTGGTCCGCTGCATCTGTGAGGTCCAGGAGGAAAATGACTTCATGATTCAGTGTGAAGAGTGCCAGTGCTGGCAGCATGGGGTCTGCATGGGATTACTGGAAGAAAATGTGCCCGAGAAATACACCTGTTATGTTTGCCAAGACCCTCCAGGTCAGAGGCC…	GGAACCTTCTCCACCCAAGGCATTTGCTGTTACCAGGTGTGGGTCCTCACACAAGCCAGGGGTCCATATGAGCCCGCAGCTTCATGGCCCAGAATCTGGACACCACAAAGGGAAAGTGAAAGCATTGGAGGAGGATAATTTGAGTGAGTCCTCTTCTGAGAGCTTTCTCTGGAGTGATGATGAGTATGGCCAAGATGTGGATGTGACCACCAACCCAGATGAGGAACTTGATGGGGATGACCGCTATGACTTCGAGGTGGTCCGCTGCATCTGTGAGGTCCAGGAGGAAAATGACTTCATGATTCAGTGTGAAGAGTGCCAGTGCTGGCAGCATGGGGTCTGCATGGGATTACTGGAAGAAAATGTGCCCGAGAAATACACCTGTTATGTTTGCCAAGA…
CEMC7_RP_hgx1880v1_pB27_A-127	5p	28874443	Homo sapiens - PHF20L1	GID: 111120330	PHF20L1; [gi|111120330|ref|NM_016018.4| Homo sapiens PHD finger protein 20-like 1 (PHF20L1), transcript variant 1, mRNA]	2571	No Data	IF	Sense		95.3			AACCAGTGAGCATAGCTTTCAAAAGCCACAAAGTTTTGGTCAGGACTGTAAATCTCTCGCATACCCTGGGAGCTCAGATGATGATGATGTTAGTAGCCTGGAAGAAGAACAAGAATTCCACATGAGAAGTAAAAACAGTTTACAGTACTCTTTAAAAGAACATGGAATGCCTGAAAAGAATCCTGCTGAAGGGAATACAGTTTTTGTTTATAATGATAAAAAGGGCACCGAAGACCCAGGAGACCCACATCTTCATTGGCTGCTTAATCTCCTTACACACATAGATAATGTGCAGAACGAAGTTACCAGCAGGATGGACCTAATAGAAAATGAAGTCGATGACTTATCAGATTTACTCTTCCTAGATGATTCTTCTACGGAGAGTTTGCTTCTGATTGG…
CEMC7_RP_hgx1880v1_pB27_A-122	5p	28874443	Homo sapiens - PHF20L1	GID: 111120330	PHF20L1; [gi|111120330|ref|NM_016018.4| Homo sapiens PHD finger protein 20-like 1 (PHF20L1), transcript variant 1, mRNA]	2571	No Data	IF	Sense		100.0			AACAAGTGAGCATAGCTATCAAAAGCCACAAAGTTTTGGTCAGGACTGTAAATCTCTCGCAGACCCTGGGAGCTCAGATGATGATGATGTTAGTAGTTTGGAAGAAGAACAAGAATTCCACATGAGAAGTAAAAACAGTTTACAGTACTCAGCAAAAGAACATGGAATGCCTGAAAAGAATCCAGCTGAAGGGAATACAGTATTTGTTTATAATGATAAAAAGGGCACCGAAGACCCAGGAGACTCACATCTTCAGTGGCAGCTCAATCTCCTTACACACATAGAAAATGTGCAGAACGAAGTTACCAGCAGGATGGACCTAATAGAAAAAGAAGTCGATGACTTATCAGATGTAGACTTCCTAGATGATTCTTCAACGGAGAGTTTGCTTCTGAGTGG…
CEMC7_RP_hgx1880v1_pB27_A-73	5p 3p	28874410	Homo sapiens - PPP2R5E	GID: 31083295	PPP2R5E; [gi|31083295|ref|NM_006246.2| Homo sapiens protein phosphatase 2, regulatory subunit B (B56), epsilon isoform (PPP2R5E), mRNA]	111	1012	IF	Sense		100.0 / 100.0			GTCTCAAGGCAAGCCTATTGAGTTAACACCTCTGCCGCTGCTAAAAGACGTTCCATCCTCAGAGCAGCCTGAACTGTTCCTAAAGAAACTTCAGCAGTGCTGTGTCATTTTTGACTTCATGGACACGCTATCTGATCTTAAAATGAAAGAATACAAGCGCTCCACTCTTAATGAACTGGTGGACTACATTACAATAAGCAGAGGCTGTTTGACAGAGCAGACTTACCCTGAAGTAGTTAGAATGGTATCTTGCAATATATTCAGAACTCTCCCTCCTAGTGACAGCAATGAATTTGATCCAGAAGAAGATGAACCTACCCTTGAGGCATCGTGGCCACACTTACAGCTTGTATATGAATTTTTCATACGATTTTTGGAAAGCCAAGAATTCCAACCCAG…	ACAGCAATGAATTTGATCCAGAAGAAGATGAACCTACCCTTGAGGCATCGTGGCCACACTTACAGCTTGTATATGAATTTTTCATACGATTTTTGGAAAGCCAAGAATTCCAACCCAGCATTGCCAAAAAATATATAGATCAGAAATTTGTATTACAGCTTCTGGAGCTATTTGACAGCGAAGACCCTCGGGAACGGGACTACTTAAAAACAGTCTTACACAGAATTTATGGCAAGTTTCTTGGTCTTAGAGCATTTATCCGAAAACAGATTAACAATATTTTTCTAAGGTTTGTTTATGAAACAGAACACTTCAATGGTGTAGCTGAACTGCTGGAAATATTAGGAAGTATTATCAATGGCTTTGCTTTACCTCTTAAGGCAGAACACAAACAGTTTC…	GTCTCAAGGCAAGCCTATTGAGTTAACACCTCTGCCGCTGCTAAAAGACGTTCCATCCTCAGAGCAGCCTGAACTGTTCCTAAAGAAACTTCAGCAGTGCTGTGTCATTTTTGACTTCATGGACACGCTATCTGATCTTAAAATGAAAGAATACAAGCGCTCCACTCTTAATGAACTGGTGGACTACATTACAATAAGCAGAGGCTGTTTGACAGAGCAGACTTACCCTGAAGTAGTTAGAATGGTATCTTGCAATATATTCAGAACTCTCCCTCCTAGTGACAGCAATGAATTTGATCCAGAAGAAGATGAACCTACCCTTGAGGCATCGTGGCCACACTTACAGCTTGTATATGAATTTTTCATACGATTTTTGGAAAGCCAAGAATTCCAACCCAG…
CEMC7_RP_hgx1880v1_pB27_A-22	5p 3p	28874410 / 28874359	Homo sapiens - PPP2R5E	GID: 31083295	PPP2R5E; [gi|31083295|ref|NM_006246.2| Homo sapiens protein phosphatase 2, regulatory subunit B (B56), epsilon isoform (PPP2R5E), mRNA]	111	2696	IF	Sense		100.0 / 65.2			GTCTCAAGGCAAGCCTATTGAGTTAACACCTCTGCCGCTGCTAAAAGACGTTCCATCCTCAGAGCAGCCTGAACTGTTCCTAAAGAAACTTCAGCAGTGCTGTGTCATTTTTGACTTCATGGACACGCTATCTGATCTTAAAATGAAAGAATACAAGCGCTCCACTCTTAATGAACTGGTGGACTACATTACAATAAGCAGAGGCTGTTTGACAGAGCAGACTTACCCTGAAGTAGTTAGAATGGTATCTTGCAATATATTCAGAACTCTCCCTCCTAGTGACAGCAATGAATTTGATCCAGAAGAAGATGAACCTACCCTTGAGGCATCGTGGCCACACTTACAGCTTGTATATGAATTTTTCATACGATTTTTGGAAAGCCAAGAATTCCAACCCAG…	CTAATAAAATTTGGCAAGTTTTTCTTAAAGGAAAAATAAGCAGTTAGAGAAAAAATGTGGAAGACTTTCTAGCCCTGACAGGCATTGAGGAGAGCAGACAAGCTCCTGTACACGGACAGATATCTGAGGAAAAAATCTGTGATCACCAACTAAAAAGGAGATACTCGTTTAGATTACACATTGGTAGGAACATTGCCCGGCCCTGGAAACTTATATACTATCGAGCAAAGAAGATGTTGGATGTCAACAATTACAAAGGCAGGTATAGCGAAGGAGATACTGAGAAGTTAAAGATGTACCATTCTCTCCTTGGGAATGACTGGAAGACGATTGGTGAGATGGTGGCCCGAAGTAGCCTCTCCGTGGCCCTCAAGTTCTCACAGATCAGCAGTCAAAGAA…	GTCTCAAGGCAAGCCTATTGAGTTAACACCTCTGCCGCTGCTAAAAGACGTTCCATCCTCAGAGCAGCCTGAACTGTTCCTAAAGAAACTTCAGCAGTGCTGTGTCATTTTTGACTTCATGGACACGCTATCTGATCTTAAAATGAAAGAATACAAGCGCTCCACTCTTAATGAACTGGTGGACTACATTACAATAAGCAGAGGCTGTTTGACAGAGCAGACTTACCCTGAAGTAGTTAGAATGGTATCTTGCAATATATTCAGAACTCTCCCTCCTAGTGACAGCAATGAATTTGATCCAGAAGAAGATGAACCTACCCTTGAGGCATCGTGGCCACACTTACAGCTTGTATATGAATTTTTCATACGATTTTTGGAAAGCCAAGAATTCCAACCCAG…
CEMC7_RP_hgx1880v1_pB27_A-33	5p 3p	28874384	Homo sapiens - PRPF40A	GID: 151301227	PRPF40A; [gi|151301227|ref|NM_017892.3| Homo sapiens PRP40 pre-mRNA processing factor 40 homolog A (S. cerevisiae) (PRPF40A), mRNA]	1578	2248	IF	Sense		93.2 / 97.4			CCAGCAGAACCAGAAGGAAAAACCAACACAAGCAGAAGAAGAGGAGACACAAAACAAGGACAAAGAAGAAGCAAAAACAAGCCACGAAGAACACAAACGGGCACCAGAAAAGGAGGAAGAAGAAGAAAAACAGAAGAGACTGCTGAGAGAAAGGAGACGACAGCGAAAAAACAGGGAATCTTTCCAGATATTTTTAGATGAATTACATGAACATGGACAACTGCATTCTATGTCATCTTGGATGGAATTGTATCCAACTATTAGTTCTGATATTAGATTCACTAATATGCTTGGTCAGCCTGTTTTTTCATTAGGATCAACTGCACTTGATCTTTTCAAGTTTTATGTTGAGGATCTTAAAGCACGTTATCATGACGAGAAGAAGATAATAAAAGACAT…	TATCCAACTTTTGCAGAAGATGAGGAGTTACAAAATATGGACAAAGAAGATGCATTAATTGCTTTGAAGAACACATTCGGGCTTTAGAAAAGGAGGAAGAAGAAGAAAAACAGAAGAGTTTGCTGAGAGAAAGGAGACGACAGCGAAAAAATAGGGAATCTTTCCAGATATTTTTAGATGAATTACATGAACATGGACAACTGCATTCTATGTCATCTTGGATGGAATTGTATCCAACTATTAGTTCTGATATTAGATTCACTAATATGCTTGGTCAGCCTGTTTTTTCATTAGGATCAACTGCACTTGATCTTTTCAAGTTTTATGTTGAGGATCTTAAAGCACGTTATCATGACGAGAAGAAGATAATAAAAGACATTCTAAAGGATAAAGGATTTG…	CCAGCAGTATCTGATGGATAATCCAACTTTTGCAGAAGATGAGGAGTTACAAAATATGGACAAAGAAGATGCATTAATTTGCTTTGAAGAACACATTCGGGCTTTAGAAAAGGAGGAAGAAGAAGAAAAACAGAAGAGTTTGCTGAGAGAAAGGAGACGACAGCGAAAAAATAGGGAATCTTTCCAGATATTTTTAGATGAATTACATGAACATGGACAACTGCATTCTATGTCATCTTGGATGGAATTGTATCCAACTATTAGTTCTGATATTAGATTCACTAATATGCTTGGTCAGCCTGGATCAACTGCACTTGATCTTTTCAAGTTTTATGTTGAGGATCTTAAAGCACGTTATCATGACGAGAAGAAGATAATAAAAGACATTCTAAAGGATAA…
CEMC7_RP_hgx1880v1_pB27_A-95	5p 3p	28874384	Homo sapiens - PRPF40A	GID: 151301227	PRPF40A; [gi|151301227|ref|NM_017892.3| Homo sapiens PRP40 pre-mRNA processing factor 40 homolog A (S. cerevisiae) (PRPF40A), mRNA]	1578	2248	IF	Sense		98.1 / 98.1			CCAGCAGTATCTGATGGATAATCCAACTTTTGCAGAAGATGAGGAGTTACAAAATATGGACAAAGAAGATGCATTAATTTGCTTTGAAGAACACATTCGGGCTTTAGAAAAGGAGGAAGAAGAAGAAAAACAGAAGAGTTTGCTGAGAGAAAGGAGACGACAGCGAAAAAATAGGGAATCTTTCCAGATATTTTTAGATGAATTACATGAACATGGACAACTGCATTCTATGTCATCTTGGATGGAATTGTATCCAACTATTAGTTCTGATATTAGATTCACTAATATGCTTGGTCAGCCTGTTTTTTCATTAGGATCAACTGCACTTGATCTTTTCAAGTTTTATGTTGAGGATCTTAAAGCACGTTATCATGACGAGAAGAAGATAATAAAAGACAT…	ACAAAGAAGATGCATTAATTTGCTTTGAAGAACACATTCGGGCTTTAGAAAAGGAGGAAGAAGAAGAAAAACAGAAGAGTTTGCTGAGAGAAAGGAGACGACAGCGAAAAAATAGGGAATCTTTCCAGATATTTTTAGATGAATTACATGAACATGGACAACTGCATTCTATGTCATCTTGGATGGAATTGTATCCAACTATTAGTTCTGATATTAGATTCACTAATATGCTTGGTCAGCCTGTTTTTTCATTAGGATCAACTGCACTTGATCTTTTCAAGTTTTATGTTGAGGATCTTAAAGCACGTTATCATGACGAGAAGAAGATAATAAAAGACATTCTAAAGGATAAAGGATTTGTAGTTGAAGTAAACACTACTTTTGAAGATTTTGTGGCGA…	CCAGCAGTATCTGATGGATAATCCAACTTTTGCAGAAGATGAGGAGTTACAAAATATGGACAAAGAAGATGCATTAATTTGCTTTGAAGAACACATTCGGGCTTTAGAAAAGGAGGAAGAAGAAGAAAAACAGAAGAGTTTGCTGAGAGAAAGGAGACGACAGCGAAAAAATAGGGAATCTTTCCAGATATTTTTAGATGAATTACATGAACATGGACAACTGCATTCTATGTCATCTTGGATGGAATTGTATCCAACTATTAGTTCTGATATTAGATTCACTAATATGCTTGGTCAGCCTGGATCAACTGCACTTGATCTTTTCAAGTTTTATGTTGAGGATCTTAAAGCACGTTATCATGACGAGAAGAAGATAATAAAAGACATTCTAAAGGATAA…
CEMC7_RP_hgx1880v1_pB27_A-42	5p 3p	28874384	Homo sapiens - PRPF40A	GID: 151301227	PRPF40A; [gi|151301227|ref|NM_017892.3| Homo sapiens PRP40 pre-mRNA processing factor 40 homolog A (S. cerevisiae) (PRPF40A), mRNA]	1578	2248	IF	Sense		98.1 / 98.2			CCAGCAGTATCTGATGGATAATCCAACTTTTGCAGAAGATGAGGAGTTACAAAATATGGACAAAGAAGATGCATTAATTTGCTTTGAAGAACACATTCGGGCTTTAGAAAAGGAGGAAGAAGAAGAAAAACAGAAGAGTTTGCTGAGAGAAAGGAGACGACAGCGAAAAAATAGGGAATCTTTCCAGATATTTTTAGATGAATTACATGAACATGGACAACTGCATTCTATGTCATCTTGGATGGAATTGTATCCAACTATTAGTTCTGATATTAGATTCACTAATATGCTTGGTCAGCCTGTTTTTTCATTAGGATCAACTGCACTTGATCTTTTCAAGTTTTATGTTGAGGATCTTAAAGCACGTTATCATGACGAGAAGAAGATAATAAAAGACAT…	TAATCCAACTTTTGCAGAAGATGAGGAGTTACAAAATATGGACAAAGAAGATGCATTAATTTGCTTTGAAGAACACATTCGGGCTTTAGAAAAGGAGGAAGAAGAAGAAAAACAGAAGAGTTTGCTGAGAGAAAGGAGACGACAGCGAAAAAATAGGGAATCTTTCCAGATATTTTTAGATGAATTACATGAACATGGACAACTGCATTCTATGTCATCTTGGATGGAATTGTATCCAACTATTAGTTCTGATATTAGATTCACTAATATGCTTGGTCAGCCTGTTTTTTCATTAGGATCAACTGCACTTGATCTTTTCAAGTTTTATGTTGAGGATCTTAAAGCACGTTATCATGACGAGAAGAAGATAATAAAAGACATTCTAAAGGATAAAGGATT…	CCAGCAGTATCTGATGGATAATCCAACTTTTGCAGAAGATGAGGAGTTACAAAATATGGACAAAGAAGATGCATTAATTTGCTTTGAAGAACACATTCGGGCTTTAGAAAAGGAGGAAGAAGAAGAAAAACAGAAGAGTTTGCTGAGAGAAAGGAGACGACAGCGAAAAAATAGGGAATCTTTCCAGATATTTTTAGATGAATTACATGAACATGGACAACTGCATTCTATGTCATCTTGGATGGAATTGTATCCAACTATTAGTTCTGATATTAGATTCACTAATATGCTTGGTCAGCCTGGATCAACTGCACTTGATCTTTTCAAGTTTTATGTTGAGGATCTTAAAGCACGTTATCATGACGAGAAGAAGATAATAAAAGACATTCTAAAGGATAA…
CEMC7_RP_hgx1880v1_pB27_A-83	5p 3p	28874438	Homo sapiens - RBL1	GID: 34577078	RBL1; [gi|34577078|ref|NM_002895.2| Homo sapiens retinoblastoma-like 1 (p107) (RBL1), transcript variant 1, mRNA]	351	1122	IF	Sense		100.0 / 100.0			ATTTCGTGAACGTATAGAAAGGCTAGAGAGAAATTTTGAGGTGTCTACTGTAATATTCAAAAAATATGAGCCAATTTTTTTAGATATATTTCAAAATCCATATGAAGAACCACCAAAGTTACCACGAAGCCGGAAGCAGAGGAGGATTCCTTGCAGTGTTAAGGATCTGTTTAATTTCTGTTGGACACTTTTTGTTTATACTAAGGGTAATTTTCGGATGATTGGGGATGACTTAGTAAACTCTTATCATTTACTTCTATGCTGCTTGGATCTGATTTTTGCCAATGCGATTATGTGCCCAAATAGACAAGACTTGCTAAATCCATCATTTAAAGGTTTACCATCTGATTTTCATACTGCTGACTTTACGGCTTCTGAAGAGCCACCCTGCATCATTGC…	GCAGAGGAGGATTCCTTGCAGTGTTAAGGATCTGTTTAATTTCTGTTGGACACTTTTTGTTTATACTAAGGGTAATTTTCGGATGATTGGGGATGACTTAGTAAACTCTTATCATTTACTTCTATGCTGCTTGGATCTGATTTTTGCCAATGCGATTATGTGCCCAAATAGACAAGACTTGCTAAATCCATCATTTAAAGGTTTACCATCTGATTTTCATACTGCTGACTTTACGGCTTCTGAAGAGCCACCCTGCATCATTGCTGTACTGTGTGAACTGCATGATGGACTTCTCGTAGAAGCAAAAGGAATAAAGGAGCACTACTTTAAGCCATATATTTCAAAACTCTTTGACAGGAAGATATTAAAAGGAGAATGCCTCCTGGACCTTTCAAGTTT…	ATTTCGTGAACGTATAGAAAGGCTAGAGAGAAATTTTGAGGTGTCTACTGTAATATTCAAAAAATATGAGCCAATTTTTTTAGATATATTTCAAAATCCATATGAAGAACCACCAAAGTTACCACGAAGCCGGAAGCAGAGGAGGATTCCTTGCAGTGTTAAGGATCTGTTTAATTTCTGTTGGACACTTTTTGTTTATACTAAGGGTAATTTTCGGATGATTGGGGATGACTTAGTAAACTCTTATCATTTACTTCTATGCTGCTTGGATCTGATTTTTGCCAATGCGATTATGTGCCCAAATAGACAAGACTTGCTAAATCCATCATTTAAAGGTTTACCATCTGATTTTCATACTGCTGACTTTACGGCTTCTGAAGAGCCACCCTGCATCATTGC…
CEMC7_RP_hgx1880v1_pB27_A-38	5p 3p	28874438	Homo sapiens - RBL1	GID: 34577078	RBL1; [gi|34577078|ref|NM_002895.2| Homo sapiens retinoblastoma-like 1 (p107) (RBL1), transcript variant 1, mRNA]	351	1122	IF	Sense		98.7 / 97.8			AACACGTGAACGAACAGAAAGGCCAGAGAGAAACACCGAGGTGTCTACTGTAATATTCAAAAAATATGAGCCAATCTTTTTAGATATATTTCAAAATCCATATGAAGAACCACCAAAGTTACCACGAAGCCGGAAGCAGAGGAGGATTCCTTGCAGTGTTAAGGATCTGTTTAATTTCTGTTGGACACTTTTTGTTTATACTAAGGGTAATTTTCGGATGATTGGGGATGACTTAGTAAACTCTTATCATTTACTTCTATGCTGCTTGGATCTGATTTTTGCCAATGCGATTATGTGCCCAAATAGACAAGACTTGCTAAATCCATCATTTAAAGGTTTACCATCTGATTTTCATACTGCTGACTTTACGGCTTCTGAAGAGCCACCCTGCATCATTGC…	ATATGAAGAACCACCAAAGTTACCACGAAGCCGGAAGCAGAGGAGGATTCCTTGCAGTGTTAAGGATCTGTTTAATTCTGTTGGACACTTTTTGTTTATACTAAGGGTAATTTTCGGATGATTGGGGATGACTTAGTAAACTCTTATCATTTACTTCTATGCTGCTTGGATCTGATTTTTGCCAATGCGATTATGTGCCCAAATAGACAAGACTTGCTAAATCCATCATTTAAAGGTTTACCATCTGATTTTCATACTGCTGACTTTACGGCTTCTGAAGAGCCACCCTGCATCATTGCTGTACTGTGTGAACTGCATGATGGACTTCTCGTAGAAGCAAAAGGAATAAAGGAGCACTACTTTAAGCCATATATTTCAAAACTCTTTGACAGGAAGATA…	ATTTCGTGAACGTATAGAAAGGCTAGAGAGAAATTTTGAGGTGTCTACTGTAATATTCAAAAAATATGAGCCAATTTTTTTAGATATATTTCAAAATCCATATGAAGAACCACCAAAGTTACCACGAAGCCGGAAGCAGAGGAGGATTCCTTGCAGTGTTAAGGATCTGTTTAATTTCTGTTGGACACTTTTTGTTTATACTAAGGGTAATTTTCGGATGATTGGGGATGACTTAGTAAACTCTTATCATTTACTTCTATGCTGCTTGGATCTGATTTTTGCCAATGCGATTATGTGCCCAAATAGACAAGACTTGCTAAATCCATCATTTAAAGGTTTACCATCTGATTTTCATACTGCTGACTTTACGGCTTCTGAAGAGCCACCCTGCATCATTGC…
CEMC7_RP_hgx1880v1_pB27_A-77	5p 3p	28874438	Homo sapiens - RBL1	GID: 34577078	RBL1; [gi|34577078|ref|NM_002895.2| Homo sapiens retinoblastoma-like 1 (p107) (RBL1), transcript variant 1, mRNA]	351	1122	IF	Sense		99.7 / 100.0			ATTTCGTGAACGTATAGAAAGGCTAGAGAGAAATTTTGAGGTGTCTACTGTAATATTCAAAAAATATGAGCCAATTTTTTTAGATATATTTCAAAATCCATATGAAGAACCACCAAAGTTACCACGAAGCCGGAAGCAGAGGAGGATTCCTTGCAGTGTTAAGGATCTGTTTAATTTCTGTTGGACACTTTTTGTTTATACTAAGGGTAATTTTCGGATGATTGGGGATGACTTAGTAAACTCTTATCATTTACTTCTATGCTGCTTGGATCTGATTTTTGCCAATGCGATTATGTGCCCAAATAGACAAGACTTGCTAAATCCATCATTTAAAGGTTTACCATCTGATTTTCATACTGCTGACTTTACGGCTTCTGAAGAGCCACCCTGCATCATTGC…	AGTTACCACGAAGCCGGAAGCAGAGGAGGATTCCTTGCAGTGTTAAGGATCTGTTTAATTTCTGTTGGACACTTTTTGTTTATACTAAGGGTAATTTTCGGATGATTGGGGATGACTTAGTAAACTCTTATCATTTACTTCTATGCTGCTTGGATCTGATTTTTGCCAATGCGATTATGTGCCCAAATAGACAAGACTTGCTAAATCCATCATTTAAAGGTTTACCATCTGATTTTCATACTGCTGACTTTACGGCTTCTGAAGAGCCACCCTGCATCATTGCTGTACTGTGTGAACTGCATGATGGACTTCTCGTAGAAGCAAAAGGAATAAAGGAGCACTACTTTAAGCCATATATTTCAAAACTCTTTGACAGGAAGATATTAAAAGGAGAATGCC…	ATTTCGTGAACGTATAGAAAGGCTAGAGAGAAATTTTGAGGTGTCTACTGTAATATTCAAAAAATATGAGCCAATTTTTTTAGATATATTTCAAAATCCATATGAAGAACCACCAAAGTTACCACGAAGCCGGAAGCAGAGGAGGATTCCTTGCAGTGTTAAGGATCTGTTTAATTTCTGTTGGACACTTTTTGTTTATACTAAGGGTAATTTTCGGATGATTGGGGATGACTTAGTAAACTCTTATCATTTACTTCTATGCTGCTTGGATCTGATTTTTGCCAATGCGATTATGTGCCCAAATAGACAAGACTTGCTAAATCCATCATTTAAAGGTTTACCATCTGATTTTCATACTGCTGACTTTACGGCTTCTGAAGAGCCACCCTGCATCATTGC…
CEMC7_RP_hgx1880v1_pB27_A-9	5p 3p	28874438	Homo sapiens - RBL1	GID: 34577078	RBL1; [gi|34577078|ref|NM_002895.2| Homo sapiens retinoblastoma-like 1 (p107) (RBL1), transcript variant 1, mRNA]	351	1122	IF	Sense		100.0 / 100.0			ATTTCGTGAACGTATAGAAAGGCTAGAGAGAAATTTTGAGGTGTCTACTGTAATATTCAAAAAATATGAGCCAATTTTTTTAGATATATTTCAAAATCCATATGAAGAACCACCAAAGTTACCACGAAGCCGGAAGCAGAGGAGGATTCCTTGCAGTGTTAAGGATCTGTTTAATTTCTGTTGGACACTTTTTGTTTATACTAAGGGTAATTTTCGGATGATTGGGGATGACTTAGTAAACTCTTATCATTTACTTCTATGCTGCTTGGATCTGATTTTTGCCAATGCGATTATGTGCCCAAATAGACAAGACTTGCTAAATCCATCATTTAAAGGTTTACCATCTGATTTTCATACTGCTGACTTTACGGCTTCTGAAGAGCCACCCTGCATCATTGC…	GTTACCACGAAGCCGGAAGCAGAGGAGGATTCCTTGCAGTGTTAAGGATCTGTTTAATTTCTGTTGGACACTTTTTGTTTATACTAAGGGTAATTTTCGGATGATTGGGGATGACTTAGTAAACTCTTATCATTTACTTCTATGCTGCTTGGATCTGATTTTTGCCAATGCGATTATGTGCCCAAATAGACAAGACTTGCTAAATCCATCATTTAAAGGTTTACCATCTGATTTTCATACTGCTGACTTTACGGCTTCTGAAGAGCCACCCTGCATCATTGCTGTACTGTGTGAACTGCATGATGGACTTCTCGTAGAAGCAAAAGGAATAAAGGAGCACTACTTTAAGCCATATATTTCAAAACTCTTTGACAGGAAGATATTAAAAGGAGAATGCCT…	ATTTCGTGAACGTATAGAAAGGCTAGAGAGAAATTTTGAGGTGTCTACTGTAATATTCAAAAAATATGAGCCAATTTTTTTAGATATATTTCAAAATCCATATGAAGAACCACCAAAGTTACCACGAAGCCGGAAGCAGAGGAGGATTCCTTGCAGTGTTAAGGATCTGTTTAATTTCTGTTGGACACTTTTTGTTTATACTAAGGGTAATTTTCGGATGATTGGGGATGACTTAGTAAACTCTTATCATTTACTTCTATGCTGCTTGGATCTGATTTTTGCCAATGCGATTATGTGCCCAAATAGACAAGACTTGCTAAATCCATCATTTAAAGGTTTACCATCTGATTTTCATACTGCTGACTTTACGGCTTCTGAAGAGCCACCCTGCATCATTGC…
CEMC7_RP_hgx1880v1_pB27_A-16	5p 3p	28874421	Homo sapiens - RBM4	GID: 93277121	RBM4; [gi|93277121|ref|NM_002896.2| Homo sapiens RNA binding motif protein 4 (RBM4), mRNA]	264	775	IF	Sense		99.2 / 99.8			CAGCACCAATAAGGAGCATCGAGCCAAGCTTGAGGAGTATGGTCCGGTCATCGAATGTGACATCGTGAAAGATTATGCCTTCGTACACATGGAGCGGGCAGAGGATGCAGTGGAGGCCATCAGGGGCCTTGATAACACAGAGTTTCAAGGCAAACGAATGCACGTGCAGTTGTCCACCAGCCGGCTTAGGACTGCGCCCGGGATGGGAGACCAGAGCGGCTGCTATCGGTGCGGGAAAGAGGGGCACTGGTCCAAAGAGTGTCCGATAGATCGTTCAGGCCGCGTGGCAGACTTGACCGAGCAATATAATGAGCAATACGGAGCAGTGCGTACGCCTTACACCATGAGCTATGGGGATTCATGGTATTACAACAACGCGTACGGAGCGCTCGATGCCTA…	CTGCACCAATAAGGAGCTTCGAGCCAAGTTTGAGGAGTATGGTCCGGTCATCGAATGTGACATCGTGAAAGATTATGCCTTCGTACACATGGAGCGGGCAGAGGATGCAGTGGAGGCCATCAGGGGCCTTGATAACACAGAGTTTCAAGGCAAACGAATGCACGTGCAGTTGTCCACCAGCCGGCTTAGGACTGCGCCCGGGATGGGAGACCAGAGCGGCTGCTATCGGTGCGGGAAAGAGGGGCACTGGTCCAAAGAGTGTCCGATAGATCGTTCAGGCCGCGTGGCAGACTTGACCGAGCAATATAATGAGCAATACGGAGCAGTGCGTACGCCTTACACCATGAGCTATGGGGATTCATTGTATTACAACAACGCGTACGGAGCGCTCGATGCCTA…	CTGCACCAATAAGGAGCTTCGAGCCAAGTTTGAGGAGTATGGTCCGGTCATCGAATGTGACATCGTGAAAGATTATGCCTTCGTACACATGGAGCGGGCAGAGGATGCAGTGGAGGCCATCAGGGGCCTTGATAACACAGAGTTTCAAGGCAAACGAATGCACGTGCAGTTGTCCACCAGCCGGCTTAGGACTGCGCCCGGGATGGGAGACCAGAGCGGCTGCTATCGGTGCGGGAAAGAGGGGCACTGGTCCAAAGAGTGTCCGATAGATCGTTCAGGCCGCGTGGCAGACTTGACCGAGCAATATAATGAGCAATACGGAGCAGTGCGTACGCCTTACACCATGAGCTATGGGGATTCATTGTATTACAACAACGCGTACGGAGCGCTCGATGCCTA…
CEMC7_RP_hgx1880v1_pB27_A-28	5p 3p	28874421	Homo sapiens - RBM4	GID: 93277121	RBM4; [gi|93277121|ref|NM_002896.2| Homo sapiens RNA binding motif protein 4 (RBM4), mRNA]	264	775	IF	Sense		100.0 / 100.0			CTGCACCAATAAGGAGCTTCGAGCCAAGTTTGAGGAGTATGGTCCGGTCATCGAATGTGACATCGTGAAAGATTATGCCTTCGTACACATGGAGCGGGCAGAGGATGCAGTGGAGGCCATCAGGGGCCTTGATAACACAGAGTTTCAAGGCAAACGAATGCACGTGCAGTTGTCCACCAGCCGGCTTAGGACTGCGCCCGGGATGGGAGACCAGAGCGGCTGCTATCGGTGCGGGAAAGAGGGGCACTGGTCCAAAGAGTGTCCGATAGATCGTTCAGGCCGCGTGGCAGACTTGACCGAGCAATATAATGAGCAATACGGAGCAGTGCGTACGCCTTACACCATGAGCTATGGGGATTCATTGTATTACAACAACGCGTACGGAGCGCTCGATGCCTA…	CTGCACCAATAAGGAGCTTCGAGCCAAGTTTGAGGAGTATGGTCCGGTCATCGAATGTGACATCGTGAAAGATTATGCCTTCGTACACATGGAGCGGGCAGAGGATGCAGTGGAGGCCATCAGGGGCCTTGATAACACAGAGTTTCAAGGCAAACGAATGCACGTGCAGTTGTCCACCAGCCGGCTTAGGACTGCGCCCGGGATGGGAGACCAGAGCGGCTGCTATCGGTGCGGGAAAGAGGGGCACTGGTCCAAAGAGTGTCCGATAGATCGTTCAGGCCGCGTGGCAGACTTGACCGAGCAATATAATGAGCAATACGGAGCAGTGCGTACGCCTTACACCATGAGCTATGGGGATTCATTGTATTACAACAACGCGTACGGAGCGCTCGATGCCTA…	CTGCACCAATAAGGAGCTTCGAGCCAAGTTTGAGGAGTATGGTCCGGTCATCGAATGTGACATCGTGAAAGATTATGCCTTCGTACACATGGAGCGGGCAGAGGATGCAGTGGAGGCCATCAGGGGCCTTGATAACACAGAGTTTCAAGGCAAACGAATGCACGTGCAGTTGTCCACCAGCCGGCTTAGGACTGCGCCCGGGATGGGAGACCAGAGCGGCTGCTATCGGTGCGGGAAAGAGGGGCACTGGTCCAAAGAGTGTCCGATAGATCGTTCAGGCCGCGTGGCAGACTTGACCGAGCAATATAATGAGCAATACGGAGCAGTGCGTACGCCTTACACCATGAGCTATGGGGATTCATTGTATTACAACAACGCGTACGGAGCGCTCGATGCCTA…
CEMC7_RP_hgx1880v1_pB27_A-21	5p 3p	28874421	Homo sapiens - RBM4	GID: 93277121	RBM4; [gi|93277121|ref|NM_002896.2| Homo sapiens RNA binding motif protein 4 (RBM4), mRNA]	264	775	IF	Sense		96.9 / 99.4			CAGCACCAAAAAGGAGCCACGAGCCAAGAAAGAGGAGAAAGGCCCGGTCATCGAATGTGACATCGTGAAAGAAAATGCCTTCGTACACATGGAGCGGGCAGAGGAAGCAGTGGAGGCCACCAGGGGCCATGATAACACAGAGTTTCAAGGCAAACGAATGCACGTGCAGTTGTCCACCAGCCGGCTTAGGACTGCGCCCGGGATGGGAGACCAGAGCGGCAGCTATCGGTGCGGGAAAGAGGGGCACTGGTCCAAAGAGTGTCCGATAGATCGTTCAGGCCGCGTGGCAGACTTGACCGAGCAATATAATGAGCAATACGGAGCAGTGCGTACGCCTTACACCATGAGCTATGGGGATTCATTGTATTACAACAACGCGTACGGAGCGCTCGATGCCTA…	CTGCACCAATAAGGAGCTTCGAGCCAAGTTTGAGGAGTATGGTCCGGTCATCGAATGTGACATCGTGAAAGATTATGCCTTCGTACACATGGAGCGGGCAGAGGATGCAGTGGAGGCCATCAGGGGCCTTGATAACACAGAGTTTCAAGGCAAACGAATGCACGTGCAGTTGTCCACCAGCCGGCTTAGGACTGCGCCCGGGATGGGAGACCAGAGCGGCTGCTATCGGTGCGGGAAAGAGGGGCACTGGTCCAAAGAGTGTCCGATAGATCGTTCAGGCCGCGTGGCAGACTTGACCGAGCAATATAATGAGCAATACGGAGCAGTGCGTACGCCTTACACCATGAGCTATGGGGATTCATTGTATTACAACAACGCGTACGGAGCGCTCGATGCCTA…	CTGCACCAATAAGGAGCTTCGAGCCAAGTTTGAGGAGTATGGTCCGGTCATCGAATGTGACATCGTGAAAGATTATGCCTTCGTACACATGGAGCGGGCAGAGGATGCAGTGGAGGCCATCAGGGGCCTTGATAACACAGAGTTTCAAGGCAAACGAATGCACGTGCAGTTGTCCACCAGCCGGCTTAGGACTGCGCCCGGGATGGGAGACCAGAGCGGCTGCTATCGGTGCGGGAAAGAGGGGCACTGGTCCAAAGAGTGTCCGATAGATCGTTCAGGCCGCGTGGCAGACTTGACCGAGCAATATAATGAGCAATACGGAGCAGTGCGTACGCCTTACACCATGAGCTATGGGGATTCATTGTATTACAACAACGCGTACGGAGCGCTCGATGCCTA…
CEMC7_RP_hgx1880v1_pB27_A-117	5p	28874415	Homo sapiens - SMARCB1	GID: 55956800	SMARCB1; [gi|55956800|ref|NM_001007468.1| Homo sapiens SWI/SNF related, matrix associated, actin dependent regulator of chromatin, subfamily b, member 1 (SMARCB1), transcript variant 2, mRNA]	15	No Data	IF	Sense		100.0			GCTGAGCAAGACCTTCGGGCAGAAGCCCGTGAAGTTCCAGCTGGAGGACGACGGCGAGTTCTACATGATCGGCTCCGAGGTGGGAAACTACCTCCGTATGTTCCGAGGTTCTCTGTACAAGAGATACCCCTCACTCTGGAGGCGACTAGCCACTGTGGAAGAGAGGAAGAAAATAGTTGCATCGTCACATGATCACGGATACACGACTCTAGCCACCAGTGTGACCCTGTTAAAAGCCTCGGAAGTGGAAGAGATTCTGGATGGCAACGATGAGAAGTACAAGGCTGTGTCCATCAGCACAGAGCCCCCCACCTACCTCAGGGAACAGAAGGCCAAGAGGAACAGCCAGTGGGTACCCACCCTGCCCAACAGCTCCCACCACTTAGATGCCGTGCCATG…
CEMC7_RP_hgx1880v1_pB27_A-20	5p 3p	28874415	Homo sapiens - SMARCB1	GID: 55956800	SMARCB1; [gi|55956800|ref|NM_001007468.1| Homo sapiens SWI/SNF related, matrix associated, actin dependent regulator of chromatin, subfamily b, member 1 (SMARCB1), transcript variant 2, mRNA]	15	989	IF	Sense		100.0 / 99.7			GCTGAGCAAGACCTTCGGGCAGAAGCCCGTGAAGTTCCAGCTGGAGGACGACGGCGAGTTCTACATGATCGGCTCCGAGGTGGGAAACTACCTCCGTATGTTCCGAGGTTCTCTGTACAAGAGATACCCCTCACTCTGGAGGCGACTAGCCACTGTGGAAGAGAGGAAGAAAATAGTTGCATCGTCACATGATCACGGATACACGACTCTAGCCACCAGTGTGACCCTGTTAAAAGCCTCGGAAGTGGAAGAGATTCTGGATGGCAACGATGAGAAGTACAAGGCTGTGTCCATCAGCACAGAGCCCCCCACCTACCTCAGGGAACAGAAGGCCAAGAGGAACAGCCAGTGGGTACCCACCCTGCCCAACAGCTCCCACCACTTAGATGCCGTGCCATG…	AGAAACAGCCAGTGGGTACCCACCCTGCCCAACAGCTCCCACCACTTAGATGCCGTGCCATGCTCCACAACCATCAACAGGAACCGCATGGGCCGAGACAAGAAGAGAACCTTCCCCCTTTGCTTTGATGACCATGACCCAGCTGTGATCCATGAGAACGCATCTCAGCCCGAGGTGCTGGTCCCCATCCGGCTGGACATGGAGATCGATGGGCAGAAGCTGCGAGACGCCTTCACCTGGAACATGAATGAGAAGTTGATGACGCCTGAGATGTTTTCAGAAATCCTCTGTGACGATCTGGATTTGAACCCGCTGACGTTTGTGCCAGCCATCGCCTCTGCCATCAGACAGCAGATCGAGTCCTACCACACGGACAGCATCCTGGAGGACCAGTCAGAC…	GCTGAGCAAGACCTTCGGGCAGAAGCCCGTGAAGTTCCAGCTGGAGGACGACGGCGAGTTCTACATGATCGGCTCCGAGGTGGGAAACTACCTCCGTATGTTCCGAGGTTCTCTGTACAAGAGATACCCCTCACTCTGGAGGCGACTAGCCACTGTGGAAGAGAGGAAGAAAATAGTTGCATCGTCACATGATCACGGATACACGACTCTAGCCACCAGTGTGACCCTGTTAAAAGCCTCGGAAGTGGAAGAGATTCTGGATGGCAACGATGAGAAGTACAAGGCTGTGTCCATCAGCACAGAGCCCCCCACCTACCTCAGGGAACAGAAGGCCAAGAGGAACAGCCAGTGGGTACCCACCCTGCCCAACAGCTCCCACCACTTAGATGCCGTGCCATG…
CEMC7_RP_hgx1880v1_pB27_A-59	5p 3p	28874415	Homo sapiens - SMARCB1	GID: 55956800	SMARCB1; [gi|55956800|ref|NM_001007468.1| Homo sapiens SWI/SNF related, matrix associated, actin dependent regulator of chromatin, subfamily b, member 1 (SMARCB1), transcript variant 2, mRNA]	336	836	IF	Sense		99.8 / 99.8			GGAACAGAAGGCCAAGAGGAACAGCCAGTGGGTACCCACCCTGCCCAACAGCTCCCACCACTTAGATGCCGTGCCATGCTCCACAACCATCAACAGGAACCGCATGGGCCGAGACAAGAAGAGAACCTTCCCCCTTTGCTTTGATGACCATGACCCAGCTGTGATCCATGAGAACGCATCTCAGCCCGAGGTGCTGGTCCCCATCCGGCTGGACATGGAGATCGATGGGCAGAAGCTGCGAGACGCCTTCACCTGGAACATGAATGAGAAGTTGATGACGCCTGAGATGTTTTCAGAAATCCTCTGTGACGATCTGGATTTGAACCCGCTGACGTTTGTGCCAGCCATCGCCTCTGCCATCAGACAGCAGATCGAGTCCTACCACACGGACAGCATCCT…	GGAACAGAAGGCCAAGAGGAACAGCCAGTGGGTACCCACCCTGCCCAACAGCTCCCACCACTTAGATGCCGTGCCATGCTCCACAACCATCAACAGGAACCGCATGGGCCGAGACAAGAAGAGAACCTTCCCCCTTTGCTTTGATGACCATGACCCAGCTGTGATCCATGAGAACGCATCTCAGCCCGAGGTGCTGGTCCCCATCCGGCTGGACATGGAGATCGATGGGCAGAAGCTGCGAGACGCCTTCACCTGGAACATGAATGAGAAGTTGATGACGCCTGAGATGTTTTCAGAAATCCTCTGTGACGATCTGGATTTGAACCCGCTGACGTTTGTGCCAGCCATCGCCTCTGCCATCAGACAGCAGATCGAGTCCTACCACACGGACAGCATCCT…	GGAACAGAAGGCCAAGAGGAACAGCCAGTGGGTACCCACCCTGCCCAACAGCTCCCACCACTTAGATGCCGTGCCATGCTCCACAACCATCAACAGGAACCGCATGGGCCGAGACAAGAAGAGAACCTTCCCCCTTTGCTTTGATGACCATGACCCAGCTGTGATCCATGAGAACGCATCTCAGCCCGAGGTGCTGGTCCCCATCCGGCTGGACATGGAGATCGATGGGCAGAAGCTGCGAGACGCCTTCACCTGGAACATGAATGAGAAGTTGATGACGCCTGAGATGTTTTCAGAAATCCTCTGTGACGATCTGGATTTGAACCCGCTGACGTTTGTGCCAGCCATCGCCTCTGCCATCAGACAGCAGATCGAGTCCTACCCCACGGACAGCATCCT…
CEMC7_RP_hgx1880v1_pB27_A-8	5p 3p	28874412 / 28874406	Homo sapiens - SUZ12	GID: 15149469	SUZ12; [gi|15149469|ref|NM_015355.1| Homo sapiens joined to JAZF1 (JJAZ1), mRNA]	1605	3483	IF	Sense		100.0 / 99.6			AACAAAAGCAAGCATGTCTGAATTTCTTGAATCTGAAGATGGGGAAGTAGAACAGCAAAGAACATATAGTAGTGGCCACAATCGTCTGTATTTCCATAGTGATACCTGCTTACCTCTCCGTCCACAAGAAATGGAAGTAGATAGTGAAGATGAAAAGGATCCTGAATGGCTAAGAGAAAAAACCATTACACAAATTGAAGAGTTTTCTGATGTTAATGAAGGAGAGAAAGAAGTGATGAAACTCTGGAATCTCCATGTCATGAAGCATGGGTTTATTGCTGACAATCAAATGAATCATGCCTGTATGCTGTTTGTAGAAAATTATGGACAGAAAATAATTAAGAAGAATTTATGTCGAAACTTCATGCTTCATCTAGTCAGCATGCATGACTTTAATCT…	TACAATTAAAAAAAGCACTTCTTCATCTATGCCTGTTTGAGAAGATATTAAATTTTCACATTGTTGACAGTGAAATGCTATGTTGGTTTATAAGATTACAGACCATTTGTTTTCATGTGGATAATTTTAGTGCATTGCTCACCCGGTATGTTTTTTTTTTTTTAACTTGAACATTTTGCTTGTTTTGTTTTTCTTTTTTAATTAGATAATCACACGGAAAATTAAGCTGTTCATATCTTTAAATTAGGATTGCAAACCAAGGAAAGAACGCATTTGAGATTTTAAGATGTCACTTATAAGGGGAGAAGTGTTCTTAAAAAGTCAACCAGAAAACTGTTATGCCTTTTATTTGTTTGCAAGGATGTCTTTGTAATGTGTTTCATGAATAGAATATCCAAT…	AACAAAAGCAAGCATGTCTGAATTTCTTGAATCTGAAGATGGGGAAGTAGAACAGCAAAGAACATATAGTAGTGGCCACAATCGTCTGTATTTCCATAGTGATACCTGCTTACCTCTCCGTCCACAAGAAATGGAAGTAGATAGTGAAGATGAAAAGGATCCTGAATGGCTAAGAGAAAAAACCATTACACAAATTGAAGAGTTTTCTGATGTTAATGAAGGAGAGAAAGAAGTGATGAAACTCTGGAATCTCCATGTCATGAAGCATGGGTTTATTGCTGACAATCAAATGAATCATGCCTGTATGCTGTTTGTAGAAAATTATGGACAGAAAATAATTAAGAAGAATTTATGTCGAAACTTCATGCTTCATCTAGTCAGCATGCATGACTTTAATCT…
CEMC7_RP_hgx1880v1_pB27_A-62	5p 3p	28874394	Homo sapiens - TPI1	GID: 52851446	TPI1; [gi|52851446|ref|NM_000365.4| Homo sapiens triosephosphate isomerase 1 (TPI1), mRNA]	126	740	IF	Sense		95.2 / 99.8			CGCCCCCCCAACGCCATTCGACGCGCCCGGCAGAAGCAGACCCAAGAGGCGTGGCGCGCAGAACGCACAAAGTGACAATGGGGCGTTACTGGGGAGACAGCCCTGGCATGATCAAAGACTGCGGAGCCACGTGGGTGGTCCTGGGGCACTCAGAGAGAAGGCTTGTCTTTGGGGAGTCAGATGAGCTGATTGGGCAGAAAGTGGCCCATGCTCTGGCAGAGGGACTCGGATTAATCGCCTGCATTGGGGAGAAGCTAGATGAAAGGGAAGCTGGCATCACTGAGAAGGGGGTTTTCGAGCAGACAAAGGTCATCGCAGATAACGTGAAGGACTGGAGCAAGGTCGTCCTGGCCTATGAGCCTGTGTGGGCCATTGGTACTGGCAAGACTGCAACACCCC…	TGCTCCCCATACTGCCTATATCGACTTCGCCCGGCAGAAGCTAGATCCCAAGATTGCTGTGGCTGCGCAGAACTGCTACAAAGTGACTAATGGGGCTTTTACTGGGGAGATCAGCCCTGGCATGATCAAAGACTGCGGAGCCACGTGGGTGGTCCTGGGGCACTCAGAGAGAAGGCATGTCTTTGGGGAGTCAGATGAGCTGATTGGGCAGAAAGTGGCCCATGCTCTGGCAGAGGGACTCGGAGTAATCGCCTGCATTGGGGAGAAGCTAGATGAAAGGGAAGCTGGCATCACTGAGAAGGTTGTTTTCGAGCAGACAAAGGTCATCGCAGATAACGTGAAGGACTGGAGCAAGGTCGTCCTGGCCTATGAGCCTGTGTGGGCCATTGGTACTGGCAA…	TGCTCCCCCTACTGCCTATATCGACTTCGCCCGGCAGAAGCTAGATCCCAAGATTGCTGTGGCTGCGCAGAACTGCTACAAAGTGACTAATGGGGCTTTTACTGGGGAGATCAGCCCTGGCATGATCAAAGACTGCGGAGCCACGTGGGTGGTCCTGGGGCACTCAGAGAGAAGGCATGTCTTTGGGGAGTCAGATGAGCTGATTGGGCAGAAAGTGGCCCATGCTCTGGCAGAGGGACTCGGAGTAATCGCCTGCATTGGGGAGAAGCTAGATGAAAGGGAAGCTGGCATCACTGAGAAGGTTGTTTTCGAGCAGACAAAGGTCATCGCAGATAACGTGAAGGACTGGAGCAAGGTCGTCCTGGCCTATGAGCCTGTGTGGGCCATTGGTACTGGCAA…
CEMC7_RP_hgx1880v1_pB27_A-37	5p 3p	28874394	Homo sapiens - TPI1	GID: 52851446	TPI1; [gi|52851446|ref|NM_000365.4| Homo sapiens triosephosphate isomerase 1 (TPI1), mRNA]	126	740	IF	Sense		97.6 / 99.8			TGCTCCCCCTACTGCCTATTTCGACTTCGCCCGGCAGAAGCTAGATCCCAAGATTGCTGTGGCTGCGCATAACTGCTACAAAGTGACTAATGGGGCTTTTACTGGGGAGATCAGCCCTGGCATGATCAAAGACTGCGGAGCCACGTGGGTGGTCCTGGGGCACTCAGAGAGAAGGCATGTCTTTGGGGAGTCAGATGAGCTGATTGGGCAGAAAGTGGCCCATGCTCTGGCAGAGGGACTTGGAGTAATCGCCTGCATTGGGGAGAAGCTTGATGAAAGGGAAGCTGGCATCACTGAGAAGGTTGTTTTCTAGCATACAAAGGTCATCGCAGATTACTTGAAGGACTGGAGCAAGGTCGTCCTGGCCTATGAGCCTGTGTGGGCCATTGGTACTGGCAA…	TGCTCCCCATACTGCCTATATCGACTTCGCCCGGCAGAAGCTAGATCCCAAGATTGCTGTGGCTGCGCAGAACTGCTACAAAGTGACTAATGGGGCTTTTACTGGGGAGATCAGCCCTGGCATGATCAAAGACTGCGGAGCCACGTGGGTGGTCCTGGGGCACTCAGAGAGAAGGCATGTCTTTGGGGAGTCAGATGAGCTGATTGGGCAGAAAGTGGCCCATGCTCTGGCAGAGGGACTCGGAGTAATCGCCTGCATTGGGGAGAAGCTAGATGAAAGGGAAGCTGGCATCACTGAGAAGGTTGTTTTCGAGCAGACAAAGGTCATCGCAGATAACGTGAAGGACTGGAGCAAGGTCGTCCTGGCCTATGAGCCTGTGTGGGCCATTGGTACTGGCAA…	TGCTCCCCCTACTGCCTATATCGACTTCGCCCGGCAGAAGCTAGATCCCAAGATTGCTGTGGCTGCGCAGAACTGCTACAAAGTGACTAATGGGGCTTTTACTGGGGAGATCAGCCCTGGCATGATCAAAGACTGCGGAGCCACGTGGGTGGTCCTGGGGCACTCAGAGAGAAGGCATGTCTTTGGGGAGTCAGATGAGCTGATTGGGCAGAAAGTGGCCCATGCTCTGGCAGAGGGACTCGGAGTAATCGCCTGCATTGGGGAGAAGCTAGATGAAAGGGAAGCTGGCATCACTGAGAAGGTTGTTTTCGAGCAGACAAAGGTCATCGCAGATAACGTGAAGGACTGGAGCAAGGTCGTCCTGGCCTATGAGCCTGTGTGGGCCATTGGTACTGGCAA…
CEMC7_RP_hgx1880v1_pB27_A-36	5p 3p	28874394	Homo sapiens - TPI1	GID: 52851446	TPI1; [gi|52851446|ref|NM_000365.4| Homo sapiens triosephosphate isomerase 1 (TPI1), mRNA]	246	757	IF	Sense		100.0 / 100.0			CATGATCAAAGACTGCGGAGCCACGTGGGTGGTCCTGGGGCACTCAGAGAGAAGGCATGTCTTTGGGGAGTCAGATGAGCTGATTGGGCAGAAAGTGGCCCATGCTCTGGCAGAGGGACTCGGAGTAATCGCCTGCATTGGGGAGAAGCTAGATGAAAGGGAAGCTGGCATCACTGAGAAGGTTGTTTTCGAGCAGACAAAGGTCATCGCAGATAACGTGAAGGACTGGAGCAAGGTCGTCCTGGCCTATGAGCCTGTGTGGGCCATTGGTACTGGCAAGACTGCAACACCCCAACAGGCCCAGGAAGTACACGAGAAGCTCCGAGGATGGCTGAAGTCCAACGTCTCTGATGCGGTGGCTCAGAGCACCCGTATCATTTATGGAGGCTCTGTGACTGG…	CATGATCAAAGACTGCGGAGCCACGTGGGTGGTCCTGGGGCACTCAGAGAGAAGGCATGTCTTTGGGGAGTCAGATGAGCTGATTGGGCAGAAAGTGGCCCATGCTCTGGCAGAGGGACTCGGAGTAATCGCCTGCATTGGGGAGAAGCTAGATGAAAGGGAAGCTGGCATCACTGAGAAGGTTGTTTTCGAGCAGACAAAGGTCATCGCAGATAACGTGAAGGACTGGAGCAAGGTCGTCCTGGCCTATGAGCCTGTGTGGGCCATTGGTACTGGCAAGACTGCAACACCCCAACAGGCCCAGGAAGTACACGAGAAGCTCCGAGGATGGCTGAAGTCCAACGTCTCTGATGCGGTGGCTCAGAGCACCCGTATCATTTATGGAGGCTCTGTGACTGG…	CATGATCAAAGACTGCGGAGCCACGTGGGTGGTCCTGGGGCACTCAGAGAGAAGGCATGTCTTTGGGGAGTCAGATGAGCTGATTGGGCAGAAAGTGGCCCATGCTCTGGCAGAGGGACTCGGAGTAATCGCCTGCATTGGGGAGAAGCTAGATGAAAGGGAAGCTGGCATCACTGAGAAGGTTGTTTTCGAGCAGACAAAGGTCATCGCAGATAACGTGAAGGACTGGAGCAAGGTCGTCCTGGCCTATGAGCCTGTGTGGGCCATTGGTACTGGCAAGACTGCAACACCCCAACAGGCCCAGGAAGTACACGAGAAGCTCCGAGGATGGCTGAAGTCCAACGTCTCTGATGCGGTGGCTCAGAGCACCCGTATCATTTATGGAGGCTCTGTGACTGG…
CEMC7_RP_hgx1880v1_pB27_A-46	5p 3p	28874370	Homo sapiens - TRIAD3	GID: 46370056	TRIAD3; [gi|46370056|ref|NM_207116.1| Homo sapiens TRIAD3 protein (TRIAD3), transcript variant 2, mRNA]	516	1378	IF	Sense		100.0 / 100.0			GTTAGATCATCCTTACTTCCAGTCTCTGAACCAACAGCCCCGTGAAATAACAAACCAGGTCGTTCCTCAGGAACGGCAGCCTGAAGCAGAACTGGGCCGCTTGTTGTTTCAGCATGAATTCCCAGGGCCCGCTTTTCCAAGGCCGGAACCCCAGCAAGGTGGGATTTCAGGCCCCTCTTCTCCTCAGCCTGCCCATCCTCTAGGAGAGTTTGAAGACCAGCAGTTAGCAAGTGATGATGAAGAGCCAGGTCCAGCCTTTCCAATGCAAGAATCTCAAGAGCCCAATTTGGAAAACATTTGGGGGCAAGAAGCTGCAGAGGTAGATCAAGAGCTCGTTGAACTACTAGTGAAAGAAACGGAAGCAAGATTTCCAGATGTAGCAAATGGGTTTATTGAGGA…	ATGATGAAGAGCCAGGTCCAGCCTTTCCAATGCAAGAATCTCAAGAGCCCAATTTGGAAAACATTTGGGGGCAAGAAGCTGCAGAGGTAGATCAAGAGCTCGTTGAACTACTAGTGAAAGAAACGGAAGCAAGATTTCCAGATGTAGCAAATGGGTTTATTGAGGAAATAATTCATTTTAAGAATTATTATGATCTGAATGTACTTTGTAATTTTCTTCTGGAAAACCCAGATTATCCAAAGAGAGAAGACAGAATCATTATAAATCCCAGTAGCAGTCTGCTGGCCAGCCAAGATGAGACAAAGTTGCCTAAAATAGACTTTTTTGACTATTCTAAATTGACCCCTCTTGACCAGCGCTGCTTCATCCAAGCTGCTGACCTCCTCATGGCCGACTTCA…	GTTAGATCATCCTTACTTCCAGTCTCTGAACCAACAGCCCCGTGAAATAACAAACCAGGTCGTTCCTCAGGAACGGCAGCCTGAAGCAGAACTGGGCCGCTTGTTGTTTCAGCATGAATTCCCAGGGCCCGCTTTTCCAAGGCCGGAACCCCAGCAAGGTGGGATTTCAGGCCCCTCTTCTCCTCAGCCTGCCCATCCTCTAGGAGAGTTTGAAGACCAGCAGTTAGCAAGTGATGATGAAGAGCCAGGTCCAGCCTTTCCAATGCAAGAATCTCAAGAGCCCAATTTGGAAAACATTTGGGGGCAAGAAGCTGCAGAGGTAGATCAAGAGCTCGTTGAACTACTAGTGAAAGAAACGGAAGCAAGATTTCCAGATGTAGCAAATGGGTTTATTGAGGA…
CEMC7_RP_hgx1880v1_pB27_A-94	5p 3p	28874341	Homo sapiens - TTC19	GID: 22547158	TTC19; [gi|22547158|ref|NM_017775.2| Homo sapiens hypothetical protein FLJ20343 (FLJ20343), mRNA]	885	1382	IF	Sense		100.0 / 100.0			GGACAATGCAATAATTGAAATTTCCCTAAAGCTGGCCAGTATCTATGCTGCGCAGAACAGACAGGAATTTGCTGTTGCTGGCTATGAATTCTGCATTTCAACTCTAGAGGAAAAAATTGAAAGAGAAAAGGAATTAGCAGAAGACATTATGTCAGTGGAAGAGAAAGCCAATACCCACCTCCTCTTGGGCATGTGCTTAGACGCCTGTGCTCGCTACCTTCTGTTCTCCAAGCAGCCGTCACAGGCACAAAGGATGTATGAAAAAGCTCTGCAGATTTCTGAAGAAATACAAGGAGAAAGACACCCACAGACCATTGTGCTGATGAGTGACCTGGCTACTACCCTGGATGCACAGGGCCGCTTTGATGAGGCCTATATTTATATGCAAAGGGCATCAGA…	GGACAATGCAATAATTGAAATTTCCCTAAAGCTGGCCAGTATCTATGCTGCGCAGAACAGACAGGAATTTGCTGTTGCTGGCTATGAATTCTGCATTTCAACTCTAGAGGAAAAAATTGAAAGAGAAAAGGAATTAGCAGAAGACATTATGTCAGTGGAAGAGAAAGCCAATACCCACCTCCTCTTGGGCATGTGCTTAGACGCCTGTGCTCGCTACCTTCTGTTCTCCAAGCAGCCGTCACAGGCACAAAGGATGTATGAAAAAGCTCTGCAGATTTCTGAAGAAATACAAGGAGAAAGACACCCACAGACCATTGTGCTGATGAGTGACCTGGCTACTACCCTGGATGCACAGGGCCGCTTTGATGAGGCCTATATTTATATGCAAAGGGCATCAGA…	GGACAATGCAATAATTGAAATTTCCCTAAAGCTGGCCAGTATCTATGCTGCGCAGAACAGACAGGAATTTGCTGTTGCTGGCTATGAATTCTGCATTTCAACTCTAGAGGAAAAAATTGAAAGAGAAAAGGAATTAGCAGAAGACATTATGTCAGTGGAAGAGAAAGCCAATACCCACCTCCTCTTGGGCATGTGCTTAGACGCCTGTGCTCGCTACCTTCTGTTCTCCAAGCAGCCGTCACAGGCACAAAGGATGTATGAAAAAGCTCTGCAGATTTCTGAAGAAATACAAGGAGAAAGACACCCACAGACCATTGTGCTGATGAGTGACCTGGCTACTACCCTGGATGCACAGGGCCGCTTTGATGAGGCCTATATTTATATGCAAAGGGCATCAGA…
CEMC7_RP_hgx1880v1_pB27_A-75	5p 3p	28874341	Homo sapiens - TTC19	GID: 22547158	TTC19; [gi|22547158|ref|NM_017775.2| Homo sapiens hypothetical protein FLJ20343 (FLJ20343), mRNA]	885	1382	IF	Sense		98.8 / 99.2			GGACAATGCAATAATTGAAATTTCCCTAAAGCTGGCCAGTATCTATGCTGCGCAGAACAGACAGGAATTTGCTGTTGCTGGCTATGAATTCTGCTTTTCAACTTTAGAGGAAAAAATTGAAAGAGAAAAGGAATTAGCAGAAGACATTATGTCAGTGGAAGAGAAAGCCAATACCCACCTCCTCTTGGGCATGTGCTTATACGCCTGTGCTCGCTACCTTCTGTTCTCCAAGCAGCCGTCACAGGCACAAAGGATGTATGAAAAAGCTTTGCAGATTTCTGAAGAAATACAAGGAGAAAGACACCCACAGACCATTGTGCTGATGAGTGACCTGGCTACTACCCTGGATGCACAGGGCCGCTTTGATGAGGCCTATATTTATATGCAAAGGGCATCAGA…	GGACAATGCAATAATTGAAATTTCCCTAAAGCTGGCCAGTATCTATGCTGCGCAGAACAGACAGGAATTTGCTGTTGCTGGCTATGAATTCTGCATTTCAACTCTAGAGGAAAAAATTGAAAGAGAAAAGGAATTAGCAGAAGACATTATGTCAGTGGAAGAGAAAGCCAATACCCACCTCCTCTTGGGCATGTGCTTAGACGCCTGTGCTCGCTACCTTCTGTTCTCCAAGCAGCCGTCACAGGCACAAAGGATGTATGAAAAAGCTCTGCAGATTTCTGAAGAAATACAAGGAGAAAGACACCCACAGACCATTGTGCTGATGAGTGACCTGGCTACTACCCTGGATGCACAGGGCCGCTTTGATGAGGCCTATATTTATATGCAAAGGGCATCAGA…	GGACAATGCAATAATTGAAATTTCCCTAAAGCTGGCCAGTATCTATGCTGCGCAGAACAGACAGGAATTTGCTGTTGCTGGCTATGAATTCTGCATTTCAACTCTAGAGGAAAAAATTGAAAGAGAAAAGGAATTAGCAGAAGACATTATGTCAGTGGAAGAGAAAGCCAATACCCACCTCCTCTTGGGCATGTGCTTAGACGCCTGTGCTCGCTACCTTCTGTTCTCCAAGCAGCCGTCACAGGCACAAAGGATGTATGAAAAAGCTCTGCAGATTTCTGAAGAAATACAAGGAGAAAGACACCCACAGACCATTGTGCTGATGAGTGACCTGGCTACTACCCTGGATGCACAGGGCCGCTTTGATGAGGCCTATATTTATATGCAAAGGGCATCAGA…
CEMC7_RP_hgx1880v1_pB27_A-11	3p	28874359	Homo sapiens - TTF1	GID: 33356178	TTF1; [gi|33356178|ref|NM_007344.2| Homo sapiens transcription termination factor, RNA polymerase I (TTF1), mRNA]	No Data	2221	??	Sense		99.5				TATTAAATTTGGCAAGTTTTCTGTAAAGGAAAATAAGCAGTTAGAGAAAAATGTGGAAGACTTTCTAGCCCTGACAGGCATTGAGAGTGCAGACAAGCTCCTGTACACGGACAGATATCCTGAGGAAAAATCTGTGATCACCAACTTAAAAAGGAGATACTCGTTTAGATTACACATTGGTAGGAACATTGCCCGGCCCTGGAAACTTATATACTATCGAGCAAAGAAGATGTTCGATGTCAACAATTACAAAGGCAGGTATAGCGAAGGAGATACTGAGAAGTTAAAGATGTACCATTCTCTCCTTGGGAATGACTGGAAGACGATTGGTGAGATGGTGGCCCGAAGTAGCCTCTCCGTGGCCCTCAAGTTCTCACAGATCAGCAGTCAAAGAAATCG…
CEMC7_RP_hgx1880v1_pB27_A-54	5p 3p	28874359	Homo sapiens - TTF1	GID: 33356178	TTF1; [gi|33356178|ref|NM_007344.2| Homo sapiens transcription termination factor, RNA polymerase I (TTF1), mRNA]	1407	2024	IF	Sense		100.0 / 99.7			TGAAGATTCCGAAATAAGATACTTATCTGCAGATTCAGGAGATGCCGATGATTCAGATGCGGATTTGGGTTCTGCCGTGAAACAGCTTCAGGAGTTCATTCCTAACATCAAGGACAGGGCCACCAGCACAATCAAGCGGATGTACCGGGACGACTTGGAACGGTTTAAGGAATTTAAAGCACAAGGTGTCGCTATTAAATTTGGCAAGTTTTCTGTAAAGGAAAATAAGCAGTTAGAGAAAAATGTGGAAGACTTTCTAGCCCTGACAGGCATTGAGAGTGCAGACAAGCTGCTGTACACGGACAGATATCCTGAGGAAAAATCTGTGATCACCAACTTAAAAAGGAGATACTCGTTTAGATTACACATTGGTAGGAACATTGCCCGGCCCTGGAAACT…	TGAAGATTCCGAAATAAGATACTATCTGCAGATTCAGGAGATGCCGATGATTCAGATGCGGATTTGGGTCTGCCGTGAAACAGCTTCAGGAGTTCATTCCTAACATCAAGGACAGGGCCACCAGCACAATCAAGCGGATGTACCGGGACGACTTGGAACGGTTTAAGGAATTTAAAGCACAAGGTGTCGCTATTAAATTTGGCAAGTTTTCTGTAAAGGAAAATAAGCAGTTAGAGAAAAATGTGGAAGACTTTCTAGCCCTGACAGGCATTGAGAGTGCAGACAAGCTGCTGTACACGGACAGATATCCTGAGGAAAAATCTGTGATCACCAACTTAAAAAGGAGATACTCGTTTAGATTACACATTGGTAGGAACATTGCCCGGCCCTGGAAACTTA…	TGAAGATTCCGAAATAAGATACTTATCTGCAGATTCAGGAGATGCCGATGATTCAGATGCGGATTTGGGTTCTGCCGTGAAACAGCTTCAGGAGTTCATTCCTAACATCAAGGACAGGGCCACCAGCACAATCAAGCGGATGTACCGGGACGACTTGGAACGGTTTAAGGAATTTAAAGCACAAGGTGTCGCTATTAAATTTGGCAAGTTTTCTGTAAAGGAAAATAAGCAGTTAGAGAAAAATGTGGAAGACTTTCTAGCCCTGACAGGCATTGAGAGTGCAGACAAGCTGCTGTACACGGACAGATATCCTGAGGAAAAATCTGTGATCACCAACTTAAAAAGGAGATACTCGTTTAGATTACACATTGGTAGGAACATTGCCCGGCCCTGGAAACT…
CEMC7_RP_hgx1880v1_pB27_A-57	5p 3p	28874357	Homo sapiens - VIM	GID: 62414288	VIM; [gi|62414288|ref|NM_003380.2| Homo sapiens vimentin (VIM), mRNA]	387	915	IF	Sense		100.0 / 99.8			GATCCTGCTGGCCGAGCTCGAGCAGCTCAAGGGCCAAGGCAAGTCGCGCCTGGGGGACCTCTACGAGGAGGAGATGCGGGAGCTGCGCCGGCAGGTGGACCAGCTAACCAACGACAAAGCCCGCGTCGAGGTGGAGCGCGACAACCTGGCCGAGGACATCATGCGCCTCCGGGAGAAATTGCAGGAGGAGATGCTTCAGAGAGAGGAAGCCGAAAACACCCTGCAATCTTTCAGACAGGATGTTGACAATGCGTCTCTGGCACGTCTTGACCTTGAACGCAAAGTGGAATCTTTGCAAGAAGAGATTGCCTTTTTGAAGAAACTCCACGAAGAGGAAATCCAGGAGCTGCAGGCTCAGATTCAGGAACAGCATGTCCAAATCGATGTGGATGTTTCCAA…	GATCGTGCTGGCCGAGCTCGAGCAGCTCAAGGGCCAAGGCAAGTCGCGCCTGGGGGACCTCTACGAGGAGGAGATGCGGGAGCTGCGCCGGCAGGTGGACCAGCTAACCAACGACAAAGCCCGCGTCGAGGTGGAGCGCGACAACCTGGCCGAGGACATCATGCGCCTCCGGGAGAAATTGCAGGAGGAGATGCTTCAGAGAGAGGAAGCCGAAAACACCCTGCAATCTTTCAGACAGGATGTTGACAATGCGTCTCTGGCACGTCTTGACCTTGAACGCAAAGTGGAATCTTTGCAAGAAGAGATTGCCTTTTTGAAGAAACTCCACGAAGAGGAAATCCAGGAGCTGCAGGCTCAGATTCAGGAACAGCATGTCCAAATCGATGTGGATGTTTCCAA…	GATCCTGCTGGCCGAGCTCGAGCAGCTCAAGGGCCAAGGCAAGTCGCGCCTGGGGGACCTCTACGAGGAGGAGATGCGGGAGCTGCGCCGGCAGGTGGACCAGCTAACCAACGACAAAGCCCGCGTCGAGGTGGAGCGCGACAACCTGGCCGAGGACATCATGCGCCTCCGGGAGAAATTGCAGGAGGAGATGCTTCAGAGAGAGGAAGCCGAAAACACCCTGCAATCTTTCAGACAGGATGTTGACAATGCGTCTCTGGCACGTCTTGACCTTGAACGCAAAGTGGAATCTTTGCAAGAAGAGATTGCCTTTTTGAAGAAACTCCACGAAGAGGAAATCCAGGAGCTGCAGGCTCAGATTCAGGAACAGCATGTCCAAATCGATGTGGATGTTTCCAA…
CEMC7_RP_hgx1880v1_pB27_A-123	5p	28874458	Homo sapiens - ZW10	GID: 17136150	ZW10; [gi|17136150|ref|NM_004724.2| Homo sapiens ZW10 homolog, centromere/kinetochore protein (Drosophila) (ZW10), mRNA]	1377	No Data	IF	Sense		97.8			GAATTTAGAGCCTGAAAATACATTGGACCAACATTCCTTTTCCTTGCCCACATGCCGTATCAGTGAGTCTGTGAAGAAATTAATGGAACTCGCCTATCACACTTTACTAGAGGCAACAACCAGTAGTGATCAATGTGCTGTTCAACTTTTCTACTCATGAGGAATATCTTCCATTTGTTCCATGATGTTGTACCAACATATCACAAGGAGAACCTTCAAAAACTTCCCCAGTTGGCTGCTATTCATCACAACAACTGTATGTACATTGCTCACCACTTGCTGACCCTCGGGCATCAGTTCAAATTGCGTCTTGCCCCCATTCTTTGTGATGGCACTGCTACTTTTGTGGATCTTGTACCTGGCTTCAGGAAACTTGGGACAAAATGCTTTTTGGCCCAC…
